# Supplementary material
Source: MDPI journal article supplement (https://www.mdpi.com/2073-4395/12/10/2426)
Supplement: s1 [file s1]

**Table S5.** Means of 11 agronomic traits for grass pea collection produced 2021 growing season, Isparta (highland), Turkey

| Genotype | USDA<br>GenBank<br>ID | First<br>flowering<br>(day) | 50%<br>flowering<br>(day) | Plant<br>height<br>(cm) | Number<br>of pods | Number<br>of<br>branches | Pod<br>height<br>(cm) | Pod<br>width<br>(cm) | Stem<br>diameter<br>(mm) | Hundred<br>seed<br>weight (g) | Biological<br>yield (g) | Seed<br>yield (g) |
|----------|-----------------------|-----------------------------|---------------------------|-------------------------|-------------------|--------------------------|-----------------------|----------------------|--------------------------|-------------------------------|-------------------------|-------------------|
| GP2      | PI 117250             | 183.6                       | 187.3                     | 45.6                    | 12.2              | 2.2                      | 2.9                   | 0.9                  | 3.3                      | 7.4                           | 4.8                     | 2.4               |
| GP6      | PI 117243             | 185.6                       | 189.3                     | 41.6                    | 17.0              | 2.6                      | 2.3                   | 0.9                  | 4.3                      | 8.8                           | 8.6                     | 3.2               |
| GP7      | PI 117283             | 182.6                       | 185.3                     | 50.6                    | 24.4              | 3.4                      | 2.3                   | 0.8                  | 4.5                      | 7.6                           | 8.5                     | 3.9               |
| GP10     | PI 117209             | 179.6                       | 184.3                     | 47.6                    | 12.6              | 3.1                      | 2.7                   | 0.8                  | 3.9                      | 6.8                           | 6.8                     | 3.1               |
| GP11     | PI 117424             | 189.6                       | 192.3                     | 40.6                    | 21.6              | 3.6                      | 3.0                   | 0.8                  | 5.4                      | 17.9                          | 33.9                    | 4.4               |
| GP17     | PI 117454             | 188.6                       | 192.3                     | 41.6                    | 31.4              | 4.8                      | 2.8                   | 1.0                  | 5.1                      | 20.8                          | 50.5                    | 10.8              |
| GP18     | PI 117594             | 199.6                       | 203.3                     | 46.2                    | 37.7              | 3.3                      | 2.5                   | 0.8                  | 5.4                      | 19.4                          | 63.7                    | 19.5              |
| GP19     | PI 117229             | 191.6                       | 195.3                     | 55.1                    | 36.8              | 5.4                      | 2.9                   | 0.9                  | 5.1                      | 23.1                          | 44.6                    | 17.5              |
| GP23     | PI 117401             | 198.6                       | 201.3                     | 51.8                    | 19.4              | 3.4                      | 2.7                   | 1.0                  | 4.3                      | 21.1                          | 27.9                    | 4.8               |
| GP34     | PI 667278             | 182.6                       | 186.3                     | 24.6                    | 31.2              | 3.2                      | 3.3                   | 1.0                  | 3.6                      | 10.2                          | 11.1                    | 3.3               |
| GP40     | PI 422539             | 192.6                       | 196.3                     | 40.6                    | 52.8              | 7.6                      | 3.7                   | 1.2                  | 4.5                      | 21.5                          | 75.7                    | 33.0              |
| GP41     | PI 358891             | 190.6                       | 193.3                     | 61.2                    | 25.8              | 5.2                      | 3.4                   | 1.2                  | 4.5                      | 20.3                          | 28.7                    | 8.3               |
| GP42     | PI 283599             | 190.3                       | 195.3                     | 49.6                    | 45.0              | 9.0                      | 2.4                   | 1.0                  | 4.4                      | 23.2                          | 48.3                    | 16.5              |
| GP43     | PI 283589             | 190.3                       | 194.3                     | 50.0                    | 23.4              | 4.2                      | 3.6                   | 1.3                  | 4.8                      | 23.4                          | 32.3                    | 5.7               |
| GP44     | PI 283580             | 197.3                       | 203.3                     | 36.6                    | 22.8              | 4.6                      | 3.0                   | 1.2                  | 4.7                      | 21.2                          | 8.9                     | 9.6               |
| GP45     | PI 283569             | 199.3                       | 205.3                     | 42.4                    | 14.9              | 4.0                      | 3.4                   | 1.4                  | 4.4                      | 19.0                          | 20.9                    | 5.7               |
| GP47     | PI 221467             | 199.3                       | 201.3                     | 45.8                    | 8.4               | 1.0                      | 3.3                   | 1.0                  | 4.4                      | 14.2                          | 7.0                     | 2.7               |
| GP49     | PI 667277             | 194.3                       | 198.3                     | 29.8                    | 19.4              | 4.0                      | 2.3                   | 1.0                  | 4.5                      | 15.9                          | 20.9                    | 4.5               |
| GP53     | PI 667271             | 197.3                       | 195.3                     | 32.2                    | 28.1              | 3.4                      | 2.9                   | 1.0                  | 2.8                      | 15.4                          | 23.6                    | 8.6               |
| GP58     | PI 667276             | 191.3                       | 196.3                     | 34.6                    | 34.4              | 4.4                      | 3.3                   | 1.3                  | 3.9                      | 15.7                          | 37.6                    | 7.4               |
| GP59     | PI 667275             | 197.3                       | 203.3                     | 43.8                    | 34.4              | 3.8                      | 3.3                   | 1.2                  | 3.9                      | 11.2                          | 29.8                    | 6.9               |
| GP60     | PI 667265             | 199.3                       | 207.3                     | 33.0                    | 19.4              | 3.0                      | 3.4                   | 1.2                  | 4.5                      | 15.9                          | 24.9                    | 6.2               |
| GP61     | PI 667264             | 194.3                       | 197.3                     | 44.3                    | 35.9              | 3.0                      | 2.8                   | 1.0                  | 3.8                      | 18.8                          | 13.0                    | 9.2               |
| GP74     | PI 513243             | 184.3                       | 188.3                     | 45.8                    | 5.4               | 2.5                      | 2.1                   | 0.8                  | 3.4                      | 18.8                          | 5.0                     | 1.8               |
| GP103    | PI 667251             | 184.3                       | 189.3                     | 24.8                    | 20.6              | 3.2                      | 3.2                   | 1.3                  | 3.3                      | 9.6                           | 5.3                     | 2.5               |
| GP104    | PI 667250             | 190.3                       | 194.3                     | 60.8                    | 22.4              | 4.2                      | 3.7                   | 1.1                  | 3.3                      | 9.3                           | 4.9                     | 1.5               |
| GP105    | PI 667248             | 181.3                       | 186.3                     | 71.8                    | 21.9              | 4.3                      | 3.0                   | 1.3                  | 2.7                      | 9.1                           | 5.0                     | 1.5               |

**Table S5.** continued

| <b>Genotype</b> | <b>USDA<br/>GenBank<br/>ID</b> | <b>First<br/>flowering<br/>(day)</b> | <b>50%<br/>flowering<br/>(day)</b> | <b>Plant<br/>height<br/>(cm)</b> | <b>Number<br/>of pods</b> | <b>Number<br/>of<br/>branches</b> | <b>Pod<br/>height<br/>(cm)</b> | <b>Pod<br/>width<br/>(cm)</b> | <b>Stem<br/>diameter<br/>(mm)</b> | <b>Hundred<br/>seed<br/>weight (g)</b> | <b>Biological<br/>yield (g)</b> | <b>Seed<br/>yield (g)</b> |
|-----------------|--------------------------------|--------------------------------------|------------------------------------|----------------------------------|---------------------------|-----------------------------------|--------------------------------|-------------------------------|-----------------------------------|----------------------------------------|---------------------------------|---------------------------|
| GP107           | PI 511770                      | 206.3                                | 213.3                              | 76.8                             | 3.4                       | 4.2                               | 3.0                            | 1.1                           | 3.4                               | 10.2                                   | 8.4                             | 3.9                       |
| GP108           | PI 507931                      | 206.3                                | 212.3                              | 19.8                             | 10.6                      | 3.0                               | 3.8                            | 1.2                           | 2.7                               | 17.9                                   | 12.7                            | 2.8                       |
| GP110           | PI 422538                      | 189.3                                | 193.3                              | 30.0                             | 13.9                      | 5.2                               | 3.2                            | 1.1                           | 2.4                               | 9.1                                    | 5.9                             | 2.6                       |
| GP114           | PI 422529                      | 181.3                                | 187.3                              | 51.8                             | 6.0                       | 2.4                               | 3.7                            | 1.1                           | 3.5                               | 12.5                                   | 7.0                             | 1.5                       |
| GP116           | PI 422521                      | 181.6                                | 183.3                              | 22.1                             | 7.2                       | 3.8                               | 4.0                            | 1.3                           | 4.2                               | 7.9                                    | 9.7                             | 1.9                       |
| GP117           | PI 337007                      | 182.3                                | 187.3                              | 28.2                             | 10.0                      | 2.2                               | 3.6                            | 1.2                           | 3.6                               | 11.3                                   | 8.6                             | 1.4                       |
| GP119           | PI 283592                      | 190.3                                | 194.3                              | 29.8                             | 11.2                      | 2.6                               | 3.8                            | 1.2                           | 4.4                               | 18.2                                   | 13.2                            | 3.1                       |
| GP120           | PI 283587                      | 185.3                                | 190.3                              | 30.4                             | 13.9                      | 3.4                               | 4.0                            | 1.1                           | 4.5                               | 12.7                                   | 12.2                            | 4.7                       |
| GP124           | PI 283579                      | 180.6                                | 183.3                              | 21.6                             | 11.6                      | 2.7                               | 2.7                            | 1.0                           | 3.6                               | 8.2                                    | 11.0                            | 2.6                       |
| GP133           | PI 232923                      | 181.3                                | 187.3                              | 34.3                             | 18.6                      | 4.4                               | 3.8                            | 1.1                           | 4.6                               | 17.9                                   | 48.4                            | 8.6                       |
| GP135           | PI 195995                      | 180.3                                | 186.3                              | 53.0                             | 36.4                      | 6.4                               | 3.3                            | 1.0                           | 5.6                               | 19.4                                   | 41.6                            | 15.2                      |
| GP145           | PI 283562                      | 179.3                                | 184.3                              | 35.2                             | 62.0                      | 7.6                               | 3.5                            | 0.9                           | 5.6                               | 18.0                                   | 82.4                            | 17.5                      |
| GP147           | PI 283576                      | 188.3                                | 193.3                              | 39.6                             | 29.2                      | 5.6                               | 3.3                            | 1.1                           | 5.6                               | 22.1                                   | 48.0                            | 16.9                      |
| GP149           | PI 283595                      | 178.6                                | 182.3                              | 22.0                             | 11.2                      | 3.8                               | 3.4                            | 1.0                           | 4.1                               | 9.6                                    | 8.4                             | 2.1                       |
| GP150           | PI 283594                      | 194.3                                | 197.3                              | 29.6                             | 20.7                      | 5.6                               | 3.9                            | 1.0                           | 4.3                               | 17.3                                   | 29.9                            | 10.0                      |
| GP152           | PI 283588                      | 194.3                                | 196.3                              | 44.0                             | 47.1                      | 3.2                               | 3.0                            | 1.1                           | 4.1                               | 9.1                                    | 27.4                            | 7.1                       |
| GP156           | PI 283559                      | 187.3                                | 192.3                              | 58.8                             | 62.0                      | 8.0                               | 2.1                            | 1.1                           | 4.2                               | 12.2                                   | 42.9                            | 16.4                      |
| GP157           | PI 193544                      | 184.1                                | 193.3                              | 62.8                             | 20.4                      | 4.1                               | 2.6                            | 1.0                           | 3.6                               | 8.4                                    | 15.1                            | 5.0                       |
| GP161           | PI 429368                      | 180.1                                | 189.3                              | 65.6                             | 58.7                      | 3.7                               | 2.5                            | 1.0                           | 3.9                               | 19.8                                   | 47.8                            | 20.3                      |
| GP163           | PI 422541                      | 185.1                                | 185.3                              | 48.6                             | 34.1                      | 4.5                               | 3.1                            | 1.0                           | 4.7                               | 13.4                                   | 28.6                            | 17.0                      |
| GP164           | PI 422531                      | 178.1                                | 187.3                              | 38.3                             | 19.6                      | 5.3                               | 3.3                            | 1.1                           | 4.3                               | 16.1                                   | 21.7                            | 6.5                       |
| GP165           | PI 422527                      | 189.1                                | 197.3                              | 31.6                             | 29.8                      | 5.5                               | 2.1                            | 0.9                           | 4.3                               | 22.1                                   | 33.1                            | 13.7                      |
| GP166           | PI 422526                      | 186.1                                | 196.3                              | 43.4                             | 25.7                      | 3.7                               | 3.1                            | 1.2                           | 3.9                               | 17.8                                   | 26.7                            | 3.5                       |
| GP177           | PI 283584                      | 180.1                                | 189.3                              | 45.6                             | 58.1                      | 4.9                               | 3.0                            | 0.9                           | 4.0                               | 21.2                                   | 19.5                            | 8.2                       |
| GP178           | PI 283577                      | 188.1                                | 196.3                              | 45.7                             | 24.9                      | 2.1                               | 3.2                            | 1.2                           | 3.9                               | 12.4                                   | 6.4                             | 2.1                       |

**Table S5.** continued

| <b>Genotype</b> | <b>USDA<br/>GenBank<br/>ID</b> | <b>First<br/>flowering<br/>(day)</b> | <b>50%<br/>flowering<br/>(day)</b> | <b>Plant<br/>height<br/>(cm)</b> | <b>Number<br/>of pods</b> | <b>Number<br/>of<br/>branches</b> | <b>Pod<br/>height<br/>(cm)</b> | <b>Pod<br/>width<br/>(cm)</b> | <b>Stem<br/>diameter<br/>(mm)</b> | <b>Hundred<br/>seed<br/>weight (g)</b> | <b>Biological<br/>yield (g)</b> | <b>Seed<br/>yield (g)</b> |
|-----------------|--------------------------------|--------------------------------------|------------------------------------|----------------------------------|---------------------------|-----------------------------------|--------------------------------|-------------------------------|-----------------------------------|----------------------------------------|---------------------------------|---------------------------|
| GP179           | PI 283573                      | 185.1                                | 193.3                              | 17.6                             | 12.8                      | 3.7                               | 3.0                            | 0.8                           | 3.6                               | 12.3                                   | 6.9                             | 1.9                       |
| GP180           | PI 283572                      | 184.1                                | 193.3                              | 40.9                             | 15.4                      | 3.5                               | 3.9                            | 1.2                           | 4.5                               | 15.2                                   | 12.8                            | 1.6                       |
| GP181           | PI 283565                      | 189.1                                | 197.3                              | 26.6                             | 9.4                       | 2.1                               | 3.8                            | 1.2                           | 3.0                               | 12.1                                   | 8.3                             | 1.7                       |
| GP182           | PI 283560                      | 180.1                                | 189.3                              | 26.6                             | 17.1                      | 3.5                               | 4.1                            | 1.2                           | 3.9                               | 13.9                                   | 9.1                             | 3.2                       |
| GP184           | PI 283561                      | 185.1                                | 194.3                              | 29.3                             | 18.8                      | 2.5                               | 3.9                            | 1.3                           | 3.3                               | 5.6                                    | 9.5                             | 4.0                       |
| GP196           | PI 337087                      | 179.6                                | 185.3                              | 22.0                             | 10.6                      | 5.6                               | 3.9                            | 1.1                           | 4.3                               | 12.9                                   | 9.0                             | 6.0                       |
| GP197           | PI 317441                      | 182.1                                | 192.3                              | 49.8                             | 8.4                       | 2.5                               | 3.3                            | 0.9                           | 3.6                               | 14.8                                   | 8.7                             | 2.4                       |
| GP198           | PI 317440                      | 185.1                                | 193.3                              | 38.6                             | 12.4                      | 3.7                               | 3.7                            | 1.0                           | 3.9                               | 9.4                                    | 8.0                             | 2.6                       |
| GP199           | PI 317439                      | 181.1                                | 192.3                              | 44.6                             | 28.4                      | 2.5                               | 3.5                            | 1.0                           | 4.4                               | 12.6                                   | 23.5                            | 4.1                       |
| GP206           | PI 283571                      | 184.1                                | 194.3                              | 46.6                             | 21.1                      | 3.1                               | 4.1                            | 1.2                           | 4.3                               | 11.8                                   | 19.4                            | 4.4                       |
| GP207           | PI 283567                      | 186.1                                | 196.3                              | 40.6                             | 10.4                      | 3.1                               | 3.4                            | 0.9                           | 3.7                               | 16.2                                   | 12.4                            | 2.5                       |
| GP209           | PI 422540                      | 187.1                                | 196.3                              | 34.2                             | 35.1                      | 3.5                               | 3.5                            | 1.2                           | 5.1                               | 11.4                                   | 26.4                            | 7.8                       |
| GP213           | PI 577139                      | 187.1                                | 195.3                              | 49.6                             | 26.1                      | 3.7                               | 4.0                            | 1.4                           | 4.0                               | 12.0                                   | 30.5                            | 6.3                       |
| GP214           | PI 577138                      | 184.1                                | 193.3                              | 38.1                             | 17.6                      | 2.7                               | 3.8                            | 1.1                           | 3.7                               | 11.9                                   | 17.1                            | 3.3                       |
| GP215           | PI 442801                      | 182.1                                | 192.3                              | 43.2                             | 24.1                      | 3.3                               | 3.7                            | 1.1                           | 3.8                               | 12.3                                   | 21.2                            | 4.8                       |
| GP222           | PI 283557                      | 181.1                                | 192.3                              | 41.6                             | 16.9                      | 4.3                               | 2.6                            | 1.0                           | 4.8                               | 13.4                                   | 16.8                            | 2.9                       |
| GP224           | PI 283555                      | 190.1                                | 202.3                              | 37.1                             | 17.9                      | 3.5                               | 2.8                            | 1.0                           | 3.8                               | 8.6                                    | 11.2                            | 2.8                       |
| GP225           | PI 283554                      | 183.1                                | 193.3                              | 38.1                             | 15.4                      | 2.7                               | 3.3                            | 1.1                           | 3.8                               | 7.6                                    | 9.2                             | 3.2                       |
| GP227           | PI 283551                      | 175.1                                | 185.3                              | 46.6                             | 26.4                      | 4.1                               | 2.7                            | 1.0                           | 3.6                               | 13.6                                   | 25.0                            | 8.5                       |
| GP228           | PI 283549                      | 178.1                                | 189.3                              | 20.6                             | 15.4                      | 1.7                               | 2.9                            | 1.0                           | 3.9                               | 12.6                                   | 13.2                            | 4.2                       |
| GP229           | PI 283548                      | 177.1                                | 187.3                              | 39.6                             | 16.4                      | 2.5                               | 2.3                            | 0.9                           | 3.1                               | 10.2                                   | 9.9                             | 1.9                       |
| GP230           | PI 268478                      | 174.1                                | 169.3                              | 49.6                             | 44.4                      | 4.7                               | 3.0                            | 1.1                           | 4.1                               | 11.1                                   | 46.2                            | 13.1                      |
| GP232           | PI 251413                      | 172.1                                | 181.3                              | 27.6                             | 26.1                      | 3.5                               | 2.7                            | 0.9                           | 3.7                               | 16.9                                   | 33.7                            | 6.9                       |
| GP233           | PI 244756                      | 178.6                                | 183.3                              | 25.6                             | 15.9                      | 3.8                               | 3.3                            | 1.0                           | 3.8                               | 15.5                                   | 16.6                            | 5.5                       |
| GP234           | PI 239867                      | 188.6                                | 192.3                              | 21.1                             | 21.2                      | 6.4                               | 3.6                            | 0.9                           | 5.7                               | 21.4                                   | 34.0                            | 7.9                       |

**Table S5.** continued

| Genotype   | USDA<br>GenBank<br>ID | First<br>flowering<br>(day) | 50%<br>flowering<br>(day) | Plant height<br>(cm) | Number of<br>pods | Number<br>of<br>branches | Pod<br>height<br>(cm) | Pod width<br>(cm) | Stem<br>diameter<br>(mm) | Hundred<br>seed<br>weight (g) | Biological<br>yield (g) | Seed<br>yield (g) |
|------------|-----------------------|-----------------------------|---------------------------|----------------------|-------------------|--------------------------|-----------------------|-------------------|--------------------------|-------------------------------|-------------------------|-------------------|
| GP235      | PI 239866             | 195.6                       | 198.3                     | 37.0                 | 6.0               | 3.7                      | 2.6                   | 0.9               | 4.7                      | 17.2                          | 7.2                     | 4.3               |
| GP237      | PI 231456             | 190.6                       | 196.3                     | 27.1                 | 17.7              | 5.6                      | 3.5                   | 0.9               | 3.7                      | 10.2                          | 5.2                     | 2.8               |
| GP242      | PI 222203             | 181.6                       | 184.3                     | 60.6                 | 26.2              | 6.0                      | 3.5                   | 1.0               | 5.3                      | 23.8                          | 50.5                    | 9.3               |
| GP243      | PI 221466             | 182.6                       | 183.3                     | 30.6                 | 8.0               | 3.0                      | 3.7                   | 0.9               | 4.3                      | 14.8                          | 9.2                     | 2.4               |
| GP244      | PI 221465             | 191.6                       | 195.3                     | 21.9                 | 2.9               | 1.2                      | 3.6                   | 1.0               | 4.2                      | 16.9                          | 6.3                     | 0.9               |
| GP246      | PI 220176             | 196.6                       | 202.3                     | 15.6                 | 18.2              | 4.8                      | 3.3                   | 1.0               | 4.2                      | 10.1                          | 5.9                     | 2.7               |
| GP247      | PI 219923             | 194.6                       | 177.3                     | 42.6                 | 13.2              | 5.2                      | 2.8                   | 0.8               | 3.3                      | 8.1                           | 6.3                     | 2.3               |
| GP248      | PI 210342             | 195.6                       | 200.3                     | 31.6                 | 15.4              | 5.3                      | 2.5                   | 0.9               | 3.5                      | 8.1                           | 4.1                     | 3.6               |
| GP249      | PI 206375             | 188.6                       | 194.3                     | 51.8                 | 8.7               | 3.0                      | 3.2                   | 1.1               | 3.6                      | 16.3                          | 14.0                    | 2.0               |
| GP251      | PI 196863             | 195.6                       | 199.3                     | 27.1                 | 14.7              | 3.0                      | 2.7                   | 0.8               | 4.4                      | 19.6                          | 17.8                    | 2.6               |
| GP256      | PI 195997             | 200.6                       | 203.3                     | 35.6                 | 20.2              | 3.7                      | 2.6                   | 0.8               | 4.4                      | 14.1                          | 27.2                    | 2.3               |
| GP262      | PI 195605             | 194.6                       | 196.3                     | 41.6                 | 26.7              | 3.6                      | 3.6                   | 1.1               | 4.0                      | 14.7                          | 27.3                    | 5.2               |
| GP270      | PI 193815             | 198.6                       | 204.3                     | 34.1                 | 9.2               | 3.3                      | 3.5                   | 1.0               | 3.8                      | 10.4                          | 9.9                     | 1.2               |
| Gürbüz     | Control               | 188.0                       | 191.7                     | 60.3                 | 16.4              | 4.7                      | 3.3                   | 0.8               | 2.8                      | 16.1                          | 14.5                    | 4.6               |
| Karadağ    | Control               | 186.0                       | 193.3                     | 52.7                 | 33.0              | 2.8                      | 3.5                   | 1.1               | 4.1                      | 14.7                          | 9.8                     | 2.9               |
| İptaş      | Control               | 191.3                       | 200.3                     | 41.0                 | 15.4              | 4.9                      | 3.3                   | 0.9               | 4.3                      | 13.7                          | 12.7                    | 3.1               |
| Corea      | Control               | 203.0                       | 178.0                     | 20.3                 | 4.2               | 4.3                      | 3.7                   | 0.8               | 2.2                      | 12.6                          | 16.6                    | 2.8               |
| Means ± SD |                       | 187.75±7.32                 | 192.94±7.32               | 39.66±12.61          | 21.97±13.01       | 3.89± 1.41               | 3.19± 0.51            | 1.03± 0.14        | 4.06± 0.7                | 14.33±4.61                    | 20.76±16.27             | 6.03±5.45         |
| LSD        |                       | ns                          | **                        | **                   | **                | **                       | **                    | **                | **                       | **                            | **                      | **                |

\*\* : Statistically significant at  $p = 0.001$  significance level. ns is non-significant

LSD is least significant differences
