# Supplementary material
Source: MDPI journal article supplement (https://www.mdpi.com/2073-4395/12/10/2426)
Supplement: s1 [file s1]

**Table S4.** Climatic data for experimental area in Isparta (highland)

| <b>Months</b> | <b>2020-2021 Growing season</b> |                           |                     |
|---------------|---------------------------------|---------------------------|---------------------|
|               | <b>Temperature (°C)</b>         | <b>Precipitation (mm)</b> | <b>Humidity (%)</b> |
| October       | 17.4                            | 48.7                      | 58.2                |
| November      | 9.3                             | 26.5                      | 63.1                |
| December      | 6.9                             | 35.4                      | 81.1                |
| January       | 5.2                             | 88.3                      | 77.8                |
| February      | 6.5                             | 16.3                      | 62.5                |
| March         | 6.7                             | 45.0                      | 62.4                |
| April         | 12.8                            | 8.0                       | 54.2                |
| May           | 19.6                            | 2.3                       | 42.7                |
| June          | 19.9                            | 145.0                     | 58.6                |
| Total         | -                               | 514.5                     |                     |
| Mean          | 11.58                           |                           | 62.29               |
