# Supplementary material
Source: MDPI journal article supplement (https://www.mdpi.com/2073-4395/12/10/2426)
Supplement: s1 [file s1]

Archive with 9 entries (9 files):
- Table S1.xlsx
- Table S2.pdf
- Table S3.pdf
- Table S4.pdf
- Table S5.pdf
- Table S6.pdf
- Table S7.pdf
- Table S8.pdf
- Table S9.pdf
