# Supplementary material
Source: MDPI journal article supplement (https://www.mdpi.com/2073-4395/12/10/2426)
Supplement: s1 [file s1 › Table S1.xlsx]

## Sheet: Sayfa1
Table S1: The initial genetic material of the study
Genotype	Genbank	Accession Number	Local name
GP1	ICIRSAT	117253	Bang-113
GP2	ICIRSAT	117250	Bang-190
GP3	ICIRSAT	117378	Bang-234
GP4	ICIRSAT	117241	Bang-186
GP5	ICIRSAT	117388	Bang-237
GP6	ICIRSAT	117243	Bang-187
GP7	ICIRSAT	117283	Bang-202
GP8	ICIRSAT	117381	Bang-235
GP9	ICIRSAT	117284	Bang-267
GP10	ICIRSAT	117209	Bang-182
GP11	ICIRSAT	117424	Bang-255
GP12	ICIRSAT	117524	Bang-290
GP13	ICIRSAT	117586	Bang-309
GP14	ICIRSAT	117440	Bang-261
GP15	ICIRSAT	117601	Bang-313
GP16	ICIRSAT	117400	Bang-241
GP17	ICIRSAT	117454	Bang-265
GP18	ICIRSAT	117594	Bang-310
GP19	ICIRSAT	117229	Bang-185
GP20	ICIRSAT	117248	Bang-188
GP21	ICIRSAT	117251	Bang-191
GP22	ICIRSAT	117375	Bang-233
GP23	ICIRSAT	117401	Bang-242
GP24	ICIRSAT	117408	Bang-249
GP25	USDA	W6 39229	Wello
GP26	USDA	W6 39228	Hyderabad
GP27	USDA	W6 39227	Mymensingh
GP28	USDA	W6 39225	LS87124
GP29	USDA	W6 39222	Derek
GP30	USDA	W6 39221	Debre Zeit
GP31	USDA	W6 39220	Jamalpur
GP32	USDA	W6 25211	ICC 136912
GP33	USDA	W6 9389	WILD PEA #2
GP34	USDA	PI 667278	IFLS 347 Sel 587
GP35	USDA	PI 667269	IFLS 432 Sel 519
GP36	USDA	PI 667268	IFLS 420 Sel 516
GP37	USDA	PI 667267	IFLS 404 Sel 508
GP38	USDA	PI 667249	W6 9389A
GP39	USDA	PI 513251	Matri
GP40	USDA	PI 422539	L-11
GP41	USDA	PI 358891	48290
GP42	USDA	PI 283599	CPI 25093
GP43	USDA	PI 283589	CPI 22834
GP44	USDA	PI 283580	CPI 20494
GP45	USDA	PI 283569	CPI 18401
GP46	USDA	PI 283564	CPI 15438
GP47	USDA	PI 221467	KALOL
GP48	USDA	W6 28025	TJK2006:281
GP49	USDA	PI 667277	IFLS 340 Sel 563
GP50	USDA	PI 667274	IFLS 486 Sel 531
GP51	USDA	PI 667273	IFLS 394 Sel 528
GP52	USDA	PI 667272	IFLS 462 Sel 527
GP53	USDA	PI 667271	IFLS 450 Sel 522
GP54	USDA	PI 667270	IFLS 433 Sel 520
GP55	USDA	PI 667266	IFLS 385 Sel 504
GP56	USDA	PI 426880	K-57
GP57	USDA	PI 226948
GP58	USDA	PI 667276	IFLS 225 Sel 554
GP59	USDA	PI 667275	IFLS 223 Sel 553
GP60	USDA	PI 667265	IFLS 273 Sel 481
GP61	USDA	PI 667264	IFLS 170 Sel 439
GP62	USDA	PI 667263	9097
GP63	USDA	PI 506418	LS8246
GP64	USDA	PI 667247	2736(4)
GP65	USDA	PI 513242	Matri
GP66	USDA	PI 667262	ICC 137210
GP67	USDA	PI 667260	ICC 137136
GP68	USDA	PI 667258	ICC 137101
GP69	USDA	PI 667254	ICC 137000
GP70	USDA	PI 667252	ICC 136959
GP71	USDA	PI 667244	L 8605
GP72	USDA	PI 513250	Matri
GP73	USDA	PI 513246	Matri
GP74	USDA	PI 513243	Matri
GP75	USDA	PI 358600	22856
GP76	USDA	PI 667259	ICC 137125
GP77	USDA	PI 667255	ICC 137017
GP78	USDA	PI 577141	2423
GP79	USDA	PI 513379	40698
GP80	USDA	PI 513244	Matri
GP81	USDA	PI 513240	Matri
GP82	USDA	PI 442793
GP83	USDA	PI 426890	K-284
GP84	USDA	PI 426889	K-270
GP85	USDA	PI 426885	K-220
GP86	USDA	PI 426883	K-207
GP87	USDA	PI 426882	K-158
GP88	USDA	PI 426881	K-128
GP89	USDA	PI 426764	K-668
GP90	USDA	PI 391433	P-597
GP91	USDA	PI 667256	ICC 137075
GP92	USDA	PI 513380	Matri
GP93	USDA	PI 513249	Matri
GP94	USDA	PI 513247	40813
GP95	USDA	PI 426896	K-340
GP96	USDA	PI 426893	K-309
GP97	USDA	PI 426891	K-296
GP98	USDA	PI 426887	K-254
GP99	USDA	PI 345525	REWA-2
GP100	USDA	PI 667261	ICC 137191
GP101	USDA	PI 667257	ICC 137088
GP102	USDA	PI 667253	ICC 136969
GP103	USDA	PI 667251	POL 114701
GP104	USDA	PI 667250	Al 143
GP105	USDA	PI 667248	Stranja
GP106	USDA	PI 543071	MATTAR DM-2
GP107	USDA	PI 511770	Alverge
GP108	USDA	PI 507931	1400421
GP109	USDA	PI 442798
GP110	USDA	PI 422538	L-10
GP111	USDA	PI 422537	L-8
GP112	USDA	PI 422536	L-7
GP113	USDA	PI 422532	Stapnak 287
GP114	USDA	PI 422529	L-06
GP115	USDA	PI 422528	L-04
GP116	USDA	PI 422521	Hungary #36
GP117	USDA	PI 337007	600
GP118	USDA	PI 283597	CPI 25091
GP119	USDA	PI 283592	CPI 22837
GP120	USDA	PI 283587	CPI 22832
GP121	USDA	PI 283586	CPI 22830
GP122	USDA	PI 283582	CPI 21949
GP123	USDA	PI 283581	CPI 20495
GP124	USDA	PI 283579	CPI 20493
GP125	USDA	PI 283578	CPI 20492
GP126	USDA	PI 283568	CPI 18447
GP127	USDA	PI 283566	CPI 15802
GP128	USDA	PI 283563	CPI 15232
GP129	USDA	PI 283553	CPI 10780
GP130	USDA	PI 283550	CPI 10724
GP131	USDA	PI 257589	GUAVE
GP132	USDA	PI 255368
GP133	USDA	PI 232923	KARCAGI
GP134	USDA	PI 209789	GEISSENER BUNTE PLATTE
GP135	USDA	PI 195995
GP136	USDA	PI 667238	falra beans
GP137	USDA	PI 667240	W6 11530
GP138	USDA	PI 667241	MATTAR DM-1
GP139	USDA	PI 667242	L 8603
GP140	USDA	PI 667243	L 8604
GP141	USDA	PI 667245	L 8617
GP142	USDA	PI 667246	P-24
GP143	USDA	PI 513241	Matri
GP144	USDA	PI 426888	K-264
GP145	USDA	PI 283562	CPI 14630
GP146	USDA	PI 179939	CHORAL
GP147	USDA	PI 283576	CPI 20490
GP148	USDA	PI 283598	CPI 25092
GP149	USDA	PI 283595	CPI 24371
GP150	USDA	PI 283594	CPI 24370
GP151	USDA	PI 283591	CPI 22836
GP152	USDA	PI 283588	CPI 22833
GP153	USDA	PI 317442	546
GP154	USDA	PI 283574	CPI 20488
GP155	USDA	PI 283570	EGYPT
GP156	USDA	PI 283559	CPI 12411
GP157	USDA	PI 193544	GUAYA
GP158	USDA	PI 442796
GP159	USDA	PI 442795
GP160	USDA	PI 442794
GP161	USDA	PI 429368	96
GP162	USDA	PI 422542
GP163	USDA	PI 422541	C53-54
GP164	USDA	PI 422531	L-08
GP165	USDA	PI 422527	IC-4
GP166	USDA	PI 422526	IC-77
GP167	USDA	PI 391432	P-534
GP168	USDA	PI 391431	P-396
GP169	USDA	PI 366129	CHINA PEA
GP170	USDA	PI 358601	22878
GP171	USDA	PI 342632
GP172	USDA	PI 317443	POTAK
GP173	USDA	PI 442800
GP174	USDA	PI 442797
GP175	USDA	PI 283547	CPI 9668
GP176	USDA	PI 223270
GP177	USDA	PI 283584	CPI 21951
GP178	USDA	PI 283577	CPI 20491
GP179	USDA	PI 283573	CPI 20487
GP180	USDA	PI 283572	CPI 20486
GP181	USDA	PI 283565	CPI 15801
GP182	USDA	PI 283560	CPI 13977
GP183	USDA	PI 218082
GP184	USDA	PI 283561	CPI 14162
GP185	USDA	PI 212312
GP186	USDA	PI 283558	CPI 11032
GP187	USDA	PI 283546	CPI 9512
GP188	USDA	PI 513245	40811
GP189	USDA	PI 442799
GP190	USDA	PI 426895	K-319
GP191	USDA	PI 426886	K-233
GP192	USDA	PI 426884	K-210
GP193	USDA	PI 422534	Stapnak 12
GP194	USDA	PI 422533	L-3
GP195	USDA	PI 370600	LOKALEN
GP196	USDA	PI 337087	616
GP197	USDA	PI 317441	MASHING
GP198	USDA	PI 317440	MASHING
GP199	USDA	PI 317439	MUSHAK
GP200	USDA	PI 317438	113
GP201	USDA	PI 286531	BN13641-62
GP202	USDA	PI 283596	CPI 24772
GP203	USDA	PI 283593	CPI 22838
GP204	USDA	PI 283590	CPI 22935
GP205	USDA	PI 283575	CPI 20489
GP206	USDA	PI 283571	CPI 20484
GP207	USDA	PI 283567	CPI 16230
GP208	USDA	PI 426897	K-540
GP209	USDA	PI 422540	L-13
GP210	USDA	PI 422524	L-48
GP211	USDA	PI 380888	266
GP212	USDA	PI 269921
GP213	USDA	PI 577139	B92-103
GP214	USDA	PI 577138	STRANDJA
GP215	USDA	PI 442801
GP216	USDA	PI 426894	K-311
GP217	USDA	PI 426892	K-305
GP218	USDA	PI 422543
GP219	USDA	PI 391430	P-24
GP220	USDA	PI 283585	CPI 21952
GP221	USDA	PI 283583	CPI 21950
GP222	USDA	PI 283557	CPI 10786
GP223	USDA	PI 283556	CPI 10785
GP224	USDA	PI 283555	CPI 10782
GP225	USDA	PI 283554	CPI 10781
GP226	USDA	PI 283552	CPI 10726
GP227	USDA	PI 283551	CPI 10725
GP228	USDA	PI 283549	CPI 10316
GP229	USDA	PI 283548	FAVETTA
GP230	USDA	PI 268478	KALUR
GP231	USDA	PI 253969
GP232	USDA	PI 251413	SANGAK
GP233	USDA	PI 244756
GP234	USDA	PI 239867
GP235	USDA	PI 239866
GP236	USDA	PI 239865
GP237	USDA	PI 231456
GP238	USDA	PI 230345	GAVDANEH
GP239	USDA	PI 227847	GAVDANCH HOROO
GP240	USDA	PI 227450	GAVDANEH
GP241	USDA	PI 223269	PATEQUE
GP242	USDA	PI 222203	PATEQUE
GP243	USDA	PI 221466	KALOL
GP244	USDA	PI 221465	KALOL; PATEQUE
GP245	USDA	PI 221463	PATEQUE
GP246	USDA	PI 220176	KO-LOOL
GP247	USDA	PI 219923	KALOL
GP248	USDA	PI 210342
GP249	USDA	PI 206375
GP250	USDA	PI 202803
GP251	USDA	PI 196863
GP252	USDA	PI 196001
GP253	USDA	PI 196000
GP254	USDA	PI 195999
GP255	USDA	PI 195998
GP256	USDA	PI 195997
GP257	USDA	PI 195996
GP258	USDA	PI 195994
GP259	USDA	PI 195993
GP260	USDA	PI 195607
GP261	USDA	PI 195606
GP262	USDA	PI 195605
GP263	USDA	PI 195604
GP264	USDA	PI 195603
GP265	USDA	PI 195602
GP266	USDA	PI 194995
GP267	USDA	PI 193994	GUAYA
GP268	USDA	PI 193993
GP269	USDA	PI 193816	GUAYA
GP270	USDA	PI 193815	GUAYA
GP271	USDA	PI 193814	GUAYA
GP272	USDA	PI 183498	TURI
GP273	USDA	PI 165528	CHATERI
GP274	USDA	PI 163293	TEORA
