# Supplementary material
Source: MDPI journal article supplement (https://www.mdpi.com/2073-4395/12/10/2426)
Supplement: s1 [file s1 › Table S2.pdf]

**Table S2.** Means of 11 agronomic traits for grass pea collection produced in the 2020 and 2021 growing seasons, Antalya (lowland), Turkey

| Genotype | USDA<br>GenBank<br>ID | First<br>flowering<br>(day) | 50%<br>flowering<br>(day) | Plant<br>height<br>(cm) | Number<br>of pods | Number<br>of<br>branches | Pod<br>height<br>(cm) | Pod<br>width<br>(cm) | Stem<br>diameter<br>(mm) | Hundred<br>seed<br>weight (g) | Biological<br>yield (g) | Seed<br>yield (g) |
|----------|-----------------------|-----------------------------|---------------------------|-------------------------|-------------------|--------------------------|-----------------------|----------------------|--------------------------|-------------------------------|-------------------------|-------------------|
| GP2      | PI 117250             | 93.0                        | 100.0                     | 64.5                    | 23.8              | 11.0                     | 3.2                   | 0.9                  | 1.3                      | 10.2                          | 8.9                     | 2.5               |
| GP6      | PI 117243             | 96.0                        | 102.3                     | 57.5                    | 20.3              | 8.8                      | 3.0                   | 1.0                  | 1.8                      | 9.4                           | 6.6                     | 2.2               |
| GP7      | PI 117283             | 95.8                        | 102.0                     | 48.0                    | 32.0              | 11.8                     | 3.2                   | 1.3                  | 1.7                      | 10.3                          | 6.4                     | 2.6               |
| GP10     | PI 117209             | 93.5                        | 100.3                     | 41.5                    | 19.0              | 12.5                     | 2.9                   | 1.0                  | 1.3                      | 10.5                          | 5.7                     | 2.4               |
| GP11     | PI 117424             | 89.3                        | 101.3                     | 59.3                    | 34.5              | 10.3                     | 3.5                   | 1.1                  | 1.5                      | 7.9                           | 6.5                     | 3.1               |
| GP17     | PI 117454             | 91.8                        | 103.0                     | 56.0                    | 13.8              | 6.0                      | 3.4                   | 1.1                  | 1.3                      | 9.6                           | 6.6                     | 2.3               |
| GP18     | PI 117594             | 91.5                        | 101.5                     | 52.5                    | 15.8              | 8.5                      | 3.8                   | 1.4                  | 1.8                      | 10.1                          | 7.5                     | 2.7               |
| GP19     | PI 117229             | 92.0                        | 102.0                     | 65.8                    | 28.8              | 9.5                      | 3.8                   | 1.2                  | 1.3                      | 11.7                          | 6.6                     | 3.2               |
| GP23     | PI 117401             | 88.8                        | 102.0                     | 52.8                    | 21.5              | 6.0                      | 3.3                   | 1.2                  | 1.7                      | 11.6                          | 3.3                     | 1.2               |
| GP34     | PI 667278             | 99.8                        | 106.8                     | 54.5                    | 7.5               | 5.5                      | 3.4                   | 1.2                  | 1.5                      | 10.7                          | 4.2                     | 1.3               |
| GP40     | PI 422539             | 103.0                       | 106.0                     | 67.3                    | 14.5              | 12.8                     | 4.0                   | 1.6                  | 1.8                      | 14.8                          | 6.2                     | 1.6               |
| GP41     | PI 358891             | 103.3                       | 110.5                     | 65.3                    | 10.8              | 8.3                      | 4.2                   | 1.6                  | 1.7                      | 15.6                          | 13.3                    | 3.7               |
| GP42     | PI 283599             | 102.5                       | 107.5                     | 67.0                    | 26.3              | 14.8                     | 4.3                   | 1.6                  | 2.3                      | 19.1                          | 11.9                    | 3.2               |
| GP43     | PI 283589             | 105.8                       | 112.5                     | 86.8                    | 31.0              | 14.3                     | 3.9                   | 1.5                  | 1.9                      | 16.0                          | 8.9                     | 2.3               |
| GP44     | PI 283580             | 97.0                        | 105.0                     | 73.8                    | 17.5              | 13.3                     | 3.8                   | 1.5                  | 1.7                      | 17.9                          | 8.0                     | 2.3               |
| GP45     | PI 283569             | 101.5                       | 112.5                     | 57.5                    | 20.0              | 7.0                      | 4.0                   | 1.4                  | 1.8                      | 16.8                          | 13.4                    | 2.5               |
| GP47     | PI 221467             | 106.5                       | 114.8                     | 57.3                    | 14.8              | 6.3                      | 3.9                   | 1.3                  | 1.7                      | 11.1                          | 7.3                     | 2.2               |
| GP49     | PI 667277             | 101.3                       | 109.5                     | 51.8                    | 24.5              | 10.5                     | 3.7                   | 1.4                  | 1.3                      | 15.5                          | 12.0                    | 3.0               |
| GP53     | PI 667271             | 95.5                        | 105.8                     | 66.0                    | 17.0              | 8.3                      | 4.0                   | 1.4                  | 1.6                      | 11.6                          | 4.4                     | 3.8               |
| GP58     | PI 667276             | 96.0                        | 103.5                     | 81.3                    | 28.8              | 9.0                      | 4.0                   | 1.5                  | 1.9                      | 14.0                          | 16.2                    | 4.2               |
| GP59     | PI 667275             | 96.0                        | 106.0                     | 60.5                    | 18.5              | 13.3                     | 3.4                   | 1.4                  | 1.9                      | 14.2                          | 14.2                    | 2.9               |
| GP60     | PI 667265             | 100.3                       | 108.0                     | 55.3                    | 27.3              | 13.3                     | 3.5                   | 1.3                  | 2.1                      | 14.8                          | 19.8                    | 5.3               |
| GP61     | PI 667264             | 96.3                        | 103.0                     | 50.3                    | 12.0              | 5.5                      | 3.3                   | 1.2                  | 2.0                      | 14.2                          | 13.4                    | 3.4               |
| GP74     | PI 513243             | 93.0                        | 99.5                      | 56.3                    | 15.0              | 8.5                      | 3.5                   | 1.3                  | 1.7                      | 9.4                           | 10.3                    | 2.1               |
| GP103    | PI 667251             | 101.5                       | 109.5                     | 75.3                    | 20.3              | 9.5                      | 3.4                   | 1.4                  | 2.2                      | 14.5                          | 16.7                    | 4.9               |
| GP104    | PI 667250             | 101.3                       | 109.5                     | 54.5                    | 16.0              | 8.0                      | 3.9                   | 1.7                  | 1.9                      | 18.8                          | 22.5                    | 6.2               |
| GP105    | PI 667248             | 103.0                       | 113.0                     | 67.0                    | 21.3              | 14.3                     | 3.7                   | 1.5                  | 1.7                      | 15.1                          | 11.8                    | 7.3               |

**Table S2.** continued

| <b>Genotype</b> | <b>USDA<br/>GenBank<br/>ID</b> | <b>First<br/>flowering<br/>(day)</b> | <b>50%<br/>flowering<br/>(day)</b> | <b>Plant<br/>height<br/>(cm)</b> | <b>Number<br/>of pods</b> | <b>Number<br/>of<br/>branches</b> | <b>Pod<br/>height<br/>(cm)</b> | <b>Pod<br/>width<br/>(cm)</b> | <b>Stem<br/>diameter<br/>(mm)</b> | <b>Hundred<br/>seed<br/>weight (g)</b> | <b>Biological<br/>yield (g)</b> | <b>Seed<br/>yield (g)</b> |
|-----------------|--------------------------------|--------------------------------------|------------------------------------|----------------------------------|---------------------------|-----------------------------------|--------------------------------|-------------------------------|-----------------------------------|----------------------------------------|---------------------------------|---------------------------|
| GP107           | PI 511770                      | 101.0                                | 108.0                              | 63.3                             | 16.0                      | 12.3                              | 3.8                            | 1.6                           | 1.9                               | 15.7                                   | 16.9                            | 4.7                       |
| GP108           | PI 507931                      | 99.0                                 | 107.5                              | 67.8                             | 30.3                      | 9.8                               | 3.6                            | 1.5                           | 1.8                               | 23.9                                   | 17.9                            | 4.4                       |
| GP110           | PI 422538                      | 103.5                                | 111.0                              | 62.8                             | 19.3                      | 10.0                              | 3.4                            | 1.4                           | 1.8                               | 20.9                                   | 16.2                            | 3.4                       |
| GP114           | PI 422529                      | 91.0                                 | 106.5                              | 73.3                             | 15.8                      | 5.5                               | 2.9                            | 1.4                           | 1.9                               | 15.8                                   | 16.0                            | 2.8                       |
| GP116           | PI 422521                      | 102.0                                | 109.5                              | 56.5                             | 21.5                      | 14.3                              | 3.3                            | 1.1                           | 2.1                               | 16.6                                   | 18.1                            | 2.7                       |
| GP117           | PI 337007                      | 105.5                                | 110.5                              | 59.3                             | 20.0                      | 10.5                              | 3.4                            | 1.2                           | 2.5                               | 12.8                                   | 11.7                            | 2.3                       |
| GP119           | PI 283592                      | 101.8                                | 108.3                              | 66.0                             | 17.5                      | 9.5                               | 3.2                            | 1.2                           | 1.8                               | 15.8                                   | 8.5                             | 1.4                       |
| GP120           | PI 283587                      | 100.5                                | 107.8                              | 77.0                             | 31.8                      | 15.5                              | 3.6                            | 1.2                           | 1.7                               | 11.2                                   | 11.1                            | 1.7                       |
| GP124           | PI 283579                      | 96.3                                 | 104.5                              | 63.5                             | 26.3                      | 15.3                              | 4.3                            | 1.6                           | 1.8                               | 13.3                                   | 14.1                            | 2.9                       |
| GP133           | PI 232923                      | 105.8                                | 111.5                              | 77.5                             | 27.0                      | 18.3                              | 4.0                            | 1.5                           | 1.9                               | 16.3                                   | 11.0                            | 1.6                       |
| GP135           | PI 195995                      | 95.0                                 | 103.3                              | 73.3                             | 32.8                      | 12.8                              | 3.4                            | 1.2                           | 1.9                               | 12.7                                   | 17.3                            | 3.7                       |
| GP145           | PI 283562                      | 94.0                                 | 105.8                              | 56.8                             | 21.3                      | 11.5                              | 3.2                            | 1.2                           | 1.9                               | 12.8                                   | 10.6                            | 2.4                       |
| GP147           | PI 283576                      | 94.5                                 | 102.8                              | 65.5                             | 18.0                      | 9.8                               | 3.8                            | 1.8                           | 1.8                               | 11.8                                   | 13.0                            | 5.2                       |
| GP149           | PI 283595                      | 106.0                                | 112.8                              | 72.5                             | 18.5                      | 7.5                               | 3.7                            | 1.4                           | 1.9                               | 13.4                                   | 12.5                            | 2.0                       |
| GP150           | PI 283594                      | 109.0                                | 116.8                              | 65.3                             | 22.5                      | 10.3                              | 2.6                            | 1.0                           | 1.9                               | 14.2                                   | 8.5                             | 1.6                       |
| GP152           | PI 283588                      | 106.5                                | 113.0                              | 75.5                             | 29.0                      | 13.8                              | 3.9                            | 1.9                           | 1.8                               | 15.2                                   | 10.0                            | 2.1                       |
| GP156           | PI 283559                      | 102.8                                | 112.5                              | 74.8                             | 25.0                      | 12.3                              | 3.7                            | 1.5                           | 1.9                               | 15.7                                   | 13.6                            | 3.0                       |
| GP157           | PI 193544                      | 102.8                                | 110.0                              | 81.5                             | 28.8                      | 8.5                               | 3.4                            | 1.3                           | 1.8                               | 12.8                                   | 12.4                            | 2.1                       |
| GP161           | PI 429368                      | 95.3                                 | 105.5                              | 73.0                             | 46.3                      | 12.8                              | 3.4                            | 1.4                           | 1.7                               | 9.3                                    | 12.4                            | 4.1                       |
| GP163           | PI 422541                      | 93.0                                 | 100.3                              | 71.5                             | 22.8                      | 9.0                               | 3.4                            | 1.3                           | 1.9                               | 13.4                                   | 7.9                             | 3.2                       |
| GP164           | PI 422531                      | 103.5                                | 108.3                              | 66.3                             | 15.5                      | 8.0                               | 3.9                            | 1.5                           | 2.0                               | 15.6                                   | 14.4                            | 3.6                       |
| GP165           | PI 422527                      | 99.5                                 | 104.5                              | 62.5                             | 25.5                      | 10.5                              | 3.2                            | 1.2                           | 2.1                               | 16.3                                   | 10.7                            | 2.8                       |
| GP166           | PI 422526                      | 99.3                                 | 104.0                              | 57.5                             | 16.0                      | 5.5                               | 3.3                            | 1.4                           | 1.8                               | 13.8                                   | 14.5                            | 3.7                       |
| GP177           | PI 283584                      | 98.8                                 | 106.0                              | 63.8                             | 25.5                      | 9.8                               | 3.8                            | 1.5                           | 2.0                               | 11.5                                   | 6.8                             | 2.4                       |
| GP178           | PI 283577                      | 92.8                                 | 101.5                              | 55.0                             | 18.0                      | 8.0                               | 2.9                            | 1.2                           | 2.0                               | 18.7                                   | 11.8                            | 3.4                       |

**Table S2.** continued

| <b>Genotype</b> | <b>USDA<br/>GenBank<br/>ID</b> | <b>First<br/>flowering<br/>(day)</b> | <b>50%<br/>flowering<br/>(day)</b> | <b>Plant<br/>height<br/>(cm)</b> | <b>Number<br/>of pods</b> | <b>Number<br/>of<br/>branches</b> | <b>Pod<br/>height<br/>(cm)</b> | <b>Pod<br/>width<br/>(cm)</b> | <b>Stem<br/>diameter<br/>(mm)</b> | <b>Hundred<br/>seed<br/>weight (g)</b> | <b>Biological<br/>yield (g)</b> | <b>Seed<br/>yield (g)</b> |
|-----------------|--------------------------------|--------------------------------------|------------------------------------|----------------------------------|---------------------------|-----------------------------------|--------------------------------|-------------------------------|-----------------------------------|----------------------------------------|---------------------------------|---------------------------|
| GP179           | PI 283573                      | 95.0                                 | 102.5                              | 49.8                             | 11.0                      | 4.0                               | 3.8                            | 1.3                           | 1.9                               | 14.4                                   | 11.4                            | 4.2                       |
| GP180           | PI 283572                      | 94.5                                 | 102.5                              | 73.0                             | 30.8                      | 11.8                              | 3.6                            | 1.4                           | 1.7                               | 15.6                                   | 4.9                             | 1.8                       |
| GP181           | PI 283565                      | 96.5                                 | 107.5                              | 46.0                             | 25.0                      | 11.8                              | 3.7                            | 1.5                           | 1.7                               | 14.8                                   | 18.0                            | 5.2                       |
| GP182           | PI 283560                      | 95.5                                 | 105.0                              | 67.3                             | 28.3                      | 14.8                              | 3.3                            | 1.2                           | 1.8                               | 13.2                                   | 11.6                            | 4.4                       |
| GP184           | PI 283561                      | 96.8                                 | 105.5                              | 84.0                             | 31.0                      | 7.0                               | 3.6                            | 1.1                           | 1.7                               | 18.3                                   | 6.2                             | 2.4                       |
| GP196           | PI 337087                      | 108.5                                | 114.0                              | 70.8                             | 26.5                      | 7.5                               | 3.7                            | 1.3                           | 2.4                               | 14.3                                   | 15.0                            | 4.5                       |
| GP197           | PI 317441                      | 108.0                                | 120.0                              | 75.5                             | 17.5                      | 5.5                               | 3.5                            | 1.3                           | 1.9                               | 7.9                                    | 7.2                             | 2.2                       |
| GP198           | PI 317440                      | 105.3                                | 112.0                              | 66.0                             | 19.5                      | 6.5                               | 3.1                            | 1.1                           | 1.8                               | 12.4                                   | 11.2                            | 2.0                       |
| GP199           | PI 317439                      | 105.8                                | 114.3                              | 80.0                             | 41.0                      | 10.5                              | 3.7                            | 1.2                           | 1.6                               | 10.4                                   | 9.6                             | 3.3                       |
| GP206           | PI 283571                      | 101.0                                | 107.0                              | 88.8                             | 31.0                      | 15.8                              | 4.0                            | 1.2                           | 1.8                               | 13.0                                   | 15.3                            | 4.6                       |
| GP207           | PI 283567                      | 96.8                                 | 107.0                              | 80.3                             | 37.8                      | 10.3                              | 3.4                            | 1.2                           | 2.2                               | 12.3                                   | 13.2                            | 5.6                       |
| GP209           | PI 422540                      | 101.8                                | 109.5                              | 87.5                             | 40.8                      | 15.3                              | 4.0                            | 1.4                           | 2.2                               | 14.8                                   | 9.3                             | 2.1                       |
| GP213           | PI 577139                      | 103.0                                | 110.0                              | 90.8                             | 31.0                      | 9.3                               | 3.4                            | 1.4                           | 1.9                               | 15.1                                   | 11.5                            | 3.2                       |
| GP214           | PI 577138                      | 106.3                                | 112.3                              | 71.3                             | 31.5                      | 9.8                               | 3.3                            | 1.3                           | 1.8                               | 13.3                                   | 9.0                             | 4.0                       |
| GP215           | PI 442801                      | 96.8                                 | 105.0                              | 42.0                             | 19.3                      | 10.3                              | 3.3                            | 1.4                           | 1.5                               | 14.2                                   | 6.2                             | 2.3                       |
| GP222           | PI 283557                      | 97.3                                 | 106.5                              | 61.3                             | 31.3                      | 8.5                               | 3.5                            | 1.1                           | 1.5                               | 12.9                                   | 9.9                             | 2.7                       |
| GP224           | PI 283555                      | 94.8                                 | 102.5                              | 59.5                             | 20.5                      | 9.5                               | 3.5                            | 1.3                           | 1.8                               | 14.3                                   | 11.1                            | 2.6                       |
| GP225           | PI 283554                      | 94.5                                 | 102.0                              | 62.3                             | 34.3                      | 9.8                               | 3.8                            | 1.4                           | 1.7                               | 15.7                                   | 10.4                            | 3.1                       |
| GP227           | PI 283551                      | 99.3                                 | 104.5                              | 54.3                             | 22.0                      | 10.0                              | 3.7                            | 1.2                           | 1.7                               | 13.8                                   | 7.7                             | 2.6                       |
| GP228           | PI 283549                      | 99.0                                 | 106.0                              | 60.5                             | 32.0                      | 9.0                               | 3.9                            | 1.4                           | 1.7                               | 13.3                                   | 7.5                             | 4.7                       |
| GP229           | PI 283548                      | 99.5                                 | 106.5                              | 70.5                             | 35.0                      | 8.0                               | 3.6                            | 1.1                           | 1.7                               | 9.7                                    | 6.9                             | 2.8                       |
| GP230           | PI 268478                      | 101.5                                | 107.5                              | 64.5                             | 26.0                      | 6.0                               | 3.8                            | 1.2                           | 1.7                               | 14.3                                   | 6.5                             | 2.5                       |
| GP232           | PI 251413                      | 105.8                                | 110.5                              | 55.3                             | 16.0                      | 9.8                               | 3.1                            | 1.3                           | 1.9                               | 11.7                                   | 6.3                             | 2.6                       |
| GP233           | PI 244756                      | 96.8                                 | 105.0                              | 71.8                             | 37.0                      | 6.0                               | 3.6                            | 1.2                           | 1.3                               | 9.1                                    | 5.9                             | 1.6                       |
| GP234           | PI 239867                      | 102.0                                | 106.0                              | 49.3                             | 20.0                      | 8.8                               | 3.6                            | 1.2                           | 2.0                               | 10.3                                   | 5.1                             | 1.3                       |

**Table S2.** continued

| Genotype       | USDA<br>GenBank<br>ID | First<br>flowering<br>(day) | 50%<br>flowering<br>(day) | Plant height<br>(cm) | Number<br>of pods | Number<br>of<br>branches | Pod<br>height<br>(cm) | Pod<br>width<br>(cm) | Stem<br>diameter<br>(mm) | Hundred<br>seed<br>weight (g) | Biological<br>yield (g) | Seed<br>yield (g) |
|----------------|-----------------------|-----------------------------|---------------------------|----------------------|-------------------|--------------------------|-----------------------|----------------------|--------------------------|-------------------------------|-------------------------|-------------------|
| GP235          | PI 239866             | 103.8                       | 109.5                     | 53.5                 | 22.5              | 8.0                      | 3.8                   | 1.2                  | 1.7                      | 13.9                          | 7.3                     | 4.7               |
| GP237          | PI 231456             | 109.0                       | 120.5                     | 67.3                 | 27.8              | 8.0                      | 3.2                   | 1.2                  | 1.9                      | 9.5                           | 7.9                     | 2.9               |
| GP242          | PI 222203             | 100.8                       | 108.3                     | 71.5                 | 25.0              | 6.5                      | 3.6                   | 1.2                  | 1.8                      | 8.9                           | 5.1                     | 1.5               |
| GP243          | PI 221466             | 101.5                       | 109.0                     | 57.0                 | 17.0              | 8.0                      | 3.4                   | 1.2                  | 1.5                      | 8.6                           | 5.4                     | 1.2               |
| GP244          | PI 221465             | 102.3                       | 110.3                     | 59.5                 | 13.5              | 3.5                      | 3.0                   | 1.1                  | 1.5                      | 9.5                           | 6.5                     | 2.5               |
| GP246          | PI 220176             | 102.3                       | 108.0                     | 70.5                 | 21.8              | 4.5                      | 3.3                   | 1.2                  | 2.3                      | 8.8                           | 9.0                     | 2.7               |
| GP247          | PI 219923             | 100.8                       | 108.0                     | 60.8                 | 22.0              | 7.8                      | 3.5                   | 1.1                  | 1.9                      | 9.5                           | 12.8                    | 4.2               |
| GP248          | PI 210342             | 104.8                       | 110.3                     | 56.5                 | 38.3              | 9.5                      | 3.3                   | 1.2                  | 1.8                      | 9.4                           | 11.4                    | 3.9               |
| GP249          | PI 206375             | 102.0                       | 111.5                     | 55.3                 | 34.8              | 11.5                     | 3.5                   | 1.2                  | 1.7                      | 11.9                          | 13.3                    | 5.6               |
| GP251          | PI 196863             | 99.5                        | 105.3                     | 72.8                 | 18.0              | 7.8                      | 3.5                   | 1.3                  | 1.5                      | 9.4                           | 6.6                     | 2.4               |
| GP256          | PI 195997             | 94.5                        | 103.0                     | 66.3                 | 14.0              | 7.0                      | 3.2                   | 1.1                  | 2.0                      | 10.2                          | 9.9                     | 3.0               |
| GP262          | PI 195605             | 94.5                        | 102.0                     | 62.8                 | 29.8              | 5.8                      | 3.1                   | 1.1                  | 1.8                      | 8.0                           | 6.2                     | 2.3               |
| GP270          | PI 193815             | 91.3                        | 99.8                      | 43.5                 | 20.3              | 6.0                      | 3.1                   | 1.1                  | 1.8                      | 10.6                          | 3.9                     | 1.5               |
| Gürbüz         | Control               | 94.5                        | 104.3                     | 59.8                 | 27.5              | 8.8                      | 3.4                   | 1.2                  | 1.6                      | 10.3                          | 7.8                     | 1.6               |
| Karadağ        | Control               | 94.3                        | 104.5                     | 58.0                 | 16.8              | 11.3                     | 3.6                   | 1.3                  | 1.8                      | 15.9                          | 8.9                     | 2.5               |
| İptaş          | Control               | 97.5                        | 109.0                     | 62.5                 | 18.8              | 9.8                      | 3.5                   | 1.2                  | 2.1                      | 13.8                          | 10.4                    | 2.9               |
| Corea          | Control               | 92.0                        | 100.5                     | 68.3                 | 28.3              | 12.3                     | 3.6                   | 1.3                  | 1.7                      | 14.0                          | 8.6                     | 1.9               |
| Means $\pm$ SD |                       | 99.15 $\pm$ 10.1            | 107.06 $\pm$ 10.5         | 64.40 $\pm$ 14.3     | 23.77 $\pm$ 10.7  | 9.65 $\pm$ 4.2           | 3.53 $\pm$ 0.4        | 1.29 $\pm$ 0.2       | 1.81 $\pm$ 0.2           | 13.15 $\pm$ 3.5               | 10.30 $\pm$ 4.2         | 3.01 $\pm$ 1.8    |
| LSD            |                       | 1.93**                      | 1.08**                    | 3.13**               | 5.86**            | 1.40**                   | 0.11**                | 0.05**               | 0.11**                   | 0.05**                        | 0.85**                  | 0.24**            |

\*\*: Statistically significant at  $p = 0.001$  significance level, respectively.

LSD is least significant differences
