# Supplementary material
Source: MDPI journal article supplement (https://www.mdpi.com/2073-4395/12/10/2426)
Supplement: s1 [file s1 › Table S3.pdf]

**Table S3.** Monthly temperature, precipitation and humidity values of experimental area in Antalya (lowland)

| <b>Months</b> | <b>Temperature (°C)</b> |                  | <b>Precipitation (mm)</b> |                  | <b>Humidity (%)</b> |                  |
|---------------|-------------------------|------------------|---------------------------|------------------|---------------------|------------------|
|               | <b>2018-2019</b>        | <b>2019-2020</b> | <b>2018-2019</b>          | <b>2019-2020</b> | <b>2018-2019</b>    | <b>2019-2020</b> |
| November      | 18.21                   | 17.20            | 88.9                      | 179.5            | 55.06               | 71.50            |
| December      | 13.19                   | 12.10            | 283.9                     | 287.2            | 78.58               | 77.20            |
| January       | 9.76                    | 10.50            | 282.7                     | 104.9            | 80.25               | 60.30            |
| February      | 11.68                   | 11.50            | 62.4                      | 79.5             | 75.61               | 72.50            |
| March         | 13.76                   | 14.00            | 51.0                      | 51.1             | 71.79               | 69.70            |
| April         | 15.99                   | 16.90            | 52.3                      | 14.9             | 72.06               | 73.40            |
| May           | 21.35                   | 21.90            | 10.6                      | 60.9             | 67.62               | 65.30            |
| June          | 25.82                   | 26.00            | 34.5                      | 3.5              | 67.72               | 61.30            |
| Totall        | -                       | -                | 866.3                     | 781.5            | -                   | -                |
| Mean          | 16.22                   | 16.26            | -                         | -                | 71.08               | 68.9             |
