# Supplementary material
Source: MDPI journal article supplement (https://www.mdpi.com/2073-4395/12/10/2426)
Supplement: s1 [file s1 › Table S6.pdf]

**Table S6.** Analysis of variance of augmented block design for 11 agronomic traits in grass pea collection produced 2021 growing season in Isparta (highland), Turkey

| Source   | df | First<br>flowering<br>(day) | 50%<br>flowering<br>(day) | Plant<br>height<br>(cm) | Number<br>of pods | Number<br>of<br>branches | Pod<br>height<br>(cm) | Pod<br>width<br>(cm) | Stem<br>diameter<br>(mm) | Hundred<br>seed<br>weight (g) | Biological<br>yield (g) | Seed<br>yield (g) |
|----------|----|-----------------------------|---------------------------|-------------------------|-------------------|--------------------------|-----------------------|----------------------|--------------------------|-------------------------------|-------------------------|-------------------|
| Genotype | 93 | 48.52 ns                    | 56.99 **                  | 176.19 **               | 175.68 **         | 1.96 **                  | 0.25 **               | 0.02 **              | 0.58 **                  | 20.66 **                      | 267.11 **               | 30.07 **          |
| Controls | 3  | 173.42 *                    | 261.89 **                 | 908.08 **               | 423.79 **         | 2.6 **                   | 0.11 **               | 0.05 **              | 3.18 **                  | 6.6 **                        | 25.18 **                | 2.22 **           |
| Block    | 2  | 47.58 ns                    | 1.33 ns                   | 1.2 ns                  | 1.23 *            | 0.01 *                   | 0.01 ns               | 3.3e-05 ns           | 0.01 *                   | 0.02 ns                       | 1.1 ns                  | 0.02 ns           |
| Error    | 6  | 25.25                       | 1.89                      | 0.29                    | 0.14              | 0.0012                   | 0.01                  | 6.7e-05              | 0.0015                   | 0.06                          | 0.83                    | 0.01              |

\*, \*\*: Statistically significant at  $p = 0.05$  and  $p = 0.001$  significance level, respectively. ns is non-significant

df is degree of freedom
