# Supplementary material
Source: MDPI journal article supplement (https://www.mdpi.com/2073-4395/12/10/2426)
Supplement: s1 [file s1 › Table S7.pdf]

**Table S7.** Means of quality and forage traits for grass pea collection produced in the 2020 and 2021 growing seasons, Antalya (lowland), Turkey

| Genotype | USDA<br>GenBank<br>ID | Beta-<br>ODAP(%) | Raw<br>protein<br>(%) | Acid<br>detergent<br>fiber (%) | Neutral<br>detergent<br>fiber (%) | Total<br>digestible<br>nutrients (%) | Dry matter<br>intake (%) | Digestible dry<br>matter (%) | Relative feed<br>values |
|----------|-----------------------|------------------|-----------------------|--------------------------------|-----------------------------------|--------------------------------------|--------------------------|------------------------------|-------------------------|
| GP2      | PI 117250             | 0.28             | 23.63                 | 8.89                           | 14.31                             | 90.22                                | 8.17                     | 82.18                        | 520.46                  |
| GP6      | PI 117243             | 0.40             | 22.82                 | 8.58                           | 14.49                             | 90.18                                | 8.14                     | 82.16                        | 518.97                  |
| GP7      | PI 117283             | 0.39             | 20.64                 | 8.74                           | 15.48                             | 90.28                                | 7.77                     | 82.22                        | 495.19                  |
| GP10     | PI 117209             | 0.43             | 22.93                 | 8.91                           | 15.94                             | 90.23                                | 7.58                     | 82.19                        | 482.81                  |
| GP11     | PI 117424             | 0.43             | 23.24                 | 8.34                           | 16.42                             | 90.75                                | 7.46                     | 82.51                        | 476.64                  |
| GP17     | PI 117454             | 0.40             | 23.66                 | 8.64                           | 15.55                             | 89.70                                | 7.78                     | 81.87                        | 493.41                  |
| GP18     | PI 117594             | 0.37             | 23.44                 | 7.49                           | 15.59                             | 91.63                                | 7.88                     | 83.04                        | 507.35                  |
| GP19     | PI 117229             | 0.35             | 25.18                 | 8.62                           | 15.80                             | 89.63                                | 7.48                     | 81.83                        | 474.51                  |
| GP23     | PI 117401             | 0.40             | 20.76                 | 9.08                           | 15.62                             | 89.61                                | 7.77                     | 81.82                        | 492.71                  |
| GP34     | PI 667278             | 0.42             | 24.62                 | 8.12                           | 17.84                             | 91.07                                | 7.41                     | 82.70                        | 474.98                  |
| GP40     | PI 422539             | 0.37             | 26.88                 | 7.48                           | 12.75                             | 91.41                                | 8.92                     | 82.90                        | 573.21                  |
| GP41     | PI 358891             | 0.28             | 24.63                 | 8.26                           | 12.63                             | 90.82                                | 9.29                     | 82.54                        | 594.29                  |
| GP42     | PI 283599             | 0.44             | 24.20                 | 7.87                           | 13.88                             | 91.10                                | 8.51                     | 82.71                        | 545.53                  |
| GP43     | PI 283589             | 0.48             | 25.68                 | 7.88                           | 14.10                             | 90.84                                | 8.74                     | 82.56                        | 559.04                  |
| GP44     | PI 283580             | 0.31             | 26.22                 | 7.11                           | 13.90                             | 91.77                                | 8.09                     | 83.12                        | 521.54                  |
| GP45     | PI 283569             | 0.42             | 25.87                 | 7.83                           | 13.77                             | 90.59                                | 8.01                     | 82.40                        | 511.68                  |
| GP47     | PI 221467             | 0.37             | 26.15                 | 7.62                           | 12.08                             | 91.25                                | 9.43                     | 82.80                        | 605.51                  |
| GP49     | PI 667277             | 0.27             | 24.80                 | 8.51                           | 16.61                             | 90.39                                | 7.01                     | 82.28                        | 446.71                  |
| GP53     | PI 667271             | 0.45             | 27.09                 | 8.09                           | 12.27                             | 90.69                                | 9.04                     | 82.47                        | 578.23                  |
| GP58     | PI 667276             | 0.27             | 24.39                 | 8.17                           | 11.55                             | 91.27                                | 9.82                     | 82.82                        | 630.61                  |
| GP59     | PI 667275             | 0.29             | 24.85                 | 8.39                           | 16.34                             | 90.73                                | 7.85                     | 82.49                        | 502.28                  |
| GP60     | PI 667265             | 0.27             | 24.57                 | 8.06                           | 12.14                             | 91.15                                | 9.55                     | 82.74                        | 612.98                  |
| GP61     | PI 667264             | 0.32             | 26.05                 | 7.73                           | 11.15                             | 90.99                                | 9.96                     | 82.65                        | 637.97                  |
| GP74     | PI 513243             | 0.38             | 26.22                 | 8.08                           | 13.61                             | 90.38                                | 8.02                     | 82.28                        | 512.38                  |
| GP103    | PI 667251             | 0.28             | 22.96                 | 7.39                           | 14.59                             | 91.55                                | 8.75                     | 82.98                        | 562.38                  |
| GP104    | PI 667250             | 0.43             | 24.98                 | 7.64                           | 12.58                             | 90.80                                | 8.52                     | 82.53                        | 545.73                  |
| GP105    | PI 667248             | 0.29             | 25.22                 | 8.34                           | 14.56                             | 90.43                                | 8.41                     | 82.31                        | 536.81                  |

**Table S7.** continued

| <b>Genotype</b> | <b>USDA<br/>GenBank<br/>ID</b> | <b>Beta-<br/>ODAP(%)</b> | <b>Raw<br/>protein<br/>(%)</b> | <b>Acid<br/>detergent<br/>fiber (%)</b> | <b>Neutral<br/>detergent<br/>fiber (%)</b> | <b>Total<br/>digestible<br/>nutrients (%)</b> | <b>Dry matter<br/>intake (%)</b> | <b>Digestible dry<br/>matter (%)</b> | <b>Relative feed<br/>values</b> |
|-----------------|--------------------------------|--------------------------|--------------------------------|-----------------------------------------|--------------------------------------------|-----------------------------------------------|----------------------------------|--------------------------------------|---------------------------------|
| GP107           | PI 511770                      | 0.29                     | 22.89                          | 8.82                                    | 14.98                                      | 90.17                                         | 8.27                             | 82.16                                | 527.08                          |
| GP108           | PI 507931                      | 0.32                     | 26.40                          | 7.38                                    | 12.35                                      | 91.58                                         | 9.12                             | 83.01                                | 586.77                          |
| GP110           | PI 422538                      | 0.27                     | 23.13                          | 7.75                                    | 14.09                                      | 91.50                                         | 8.54                             | 82.95                                | 549.21                          |
| GP114           | PI 422529                      | 0.33                     | 20.46                          | 7.85                                    | 15.23                                      | 91.31                                         | 7.71                             | 82.84                                | 495.06                          |
| GP116           | PI 422521                      | 0.44                     | 22.93                          | 8.10                                    | 14.26                                      | 91.01                                         | 8.75                             | 82.66                                | 560.79                          |
| GP117           | PI 337007                      | 0.32                     | 24.23                          | 8.12                                    | 13.40                                      | 91.25                                         | 8.83                             | 82.80                                | 566.25                          |
| GP119           | PI 283592                      | 0.48                     | 23.09                          | 7.52                                    | 16.97                                      | 91.67                                         | 8.22                             | 83.06                                | 529.74                          |
| GP120           | PI 283587                      | 0.40                     | 24.74                          | 7.86                                    | 13.93                                      | 90.90                                         | 7.85                             | 82.59                                | 502.69                          |
| GP124           | PI 283579                      | 0.37                     | 24.97                          | 8.69                                    | 12.34                                      | 90.29                                         | 9.29                             | 82.23                                | 592.26                          |
| GP133           | PI 232923                      | 0.47                     | 22.62                          | 8.75                                    | 13.66                                      | 90.24                                         | 8.74                             | 82.19                                | 556.68                          |
| GP135           | PI 195995                      | 0.47                     | 24.28                          | 7.66                                    | 12.32                                      | 91.43                                         | 9.42                             | 82.91                                | 605.03                          |
| GP145           | PI 283562                      | 0.36                     | 25.10                          | 8.29                                    | 11.85                                      | 90.14                                         | 9.27                             | 82.13                                | 590.46                          |
| GP147           | PI 283576                      | 0.43                     | 24.76                          | 8.41                                    | 13.29                                      | 90.56                                         | 8.82                             | 82.39                                | 562.87                          |
| GP149           | PI 283595                      | 0.47                     | 22.09                          | 7.90                                    | 17.42                                      | 91.17                                         | 7.81                             | 82.76                                | 500.90                          |
| GP150           | PI 283594                      | 0.47                     | 22.76                          | 7.60                                    | 15.29                                      | 91.25                                         | 7.74                             | 82.80                                | 497.33                          |
| GP152           | PI 283588                      | 0.38                     | 26.26                          | 7.42                                    | 11.29                                      | 91.29                                         | 9.34                             | 82.83                                | 600.47                          |
| GP156           | PI 283559                      | 0.33                     | 23.04                          | 8.61                                    | 17.56                                      | 90.14                                         | 6.48                             | 82.14                                | 411.88                          |
| GP157           | PI 193544                      | 0.40                     | 24.72                          | 7.80                                    | 11.30                                      | 90.75                                         | 9.35                             | 82.51                                | 598.48                          |
| GP161           | PI 429368                      | 0.31                     | 26.41                          | 7.64                                    | 13.12                                      | 90.65                                         | 8.25                             | 82.44                                | 527.69                          |
| GP163           | PI 422541                      | 0.34                     | 24.47                          | 7.97                                    | 12.21                                      | 90.56                                         | 8.66                             | 82.39                                | 553.20                          |
| GP164           | PI 422531                      | 0.41                     | 24.66                          | 7.70                                    | 12.40                                      | 91.27                                         | 8.48                             | 82.82                                | 544.36                          |
| GP165           | PI 422527                      | 0.31                     | 25.55                          | 7.24                                    | 12.11                                      | 91.48                                         | 9.46                             | 82.95                                | 607.85                          |
| GP166           | PI 422526                      | 0.33                     | 24.93                          | 7.83                                    | 11.78                                      | 90.80                                         | 9.64                             | 82.54                                | 616.58                          |
| GP177           | PI 283584                      | 0.41                     | 26.46                          | 7.75                                    | 12.28                                      | 90.34                                         | 8.94                             | 82.26                                | 570.87                          |
| GP178           | PI 283577                      | 0.39                     | 22.76                          | 7.78                                    | 12.24                                      | 91.72                                         | 9.20                             | 83.09                                | 592.70                          |

**Table S7.** continued

| <b>Genotype</b> | <b>USDA<br/>GenBank<br/>ID</b> | <b>Beta-<br/>ODAP(%)</b> | <b>Raw<br/>protein<br/>(%)</b> | <b>Acid<br/>detergent<br/>fiber (%)</b> | <b>Neutral<br/>detergent<br/>fiber (%)</b> | <b>Total<br/>digestible<br/>nutrients (%)</b> | <b>Dry matter<br/>intake (%)</b> | <b>Digestible dry<br/>matter (%)</b> | <b>Relative feed<br/>values</b> |
|-----------------|--------------------------------|--------------------------|--------------------------------|-----------------------------------------|--------------------------------------------|-----------------------------------------------|----------------------------------|--------------------------------------|---------------------------------|
| GP179           | PI 283573                      | 0.33                     | 25.17                          | 7.48                                    | 13.18                                      | 91.14                                         | 8.51                             | 82.74                                | 545.68                          |
| GP180           | PI 283572                      | 0.38                     | 23.72                          | 8.23                                    | 12.64                                      | 90.69                                         | 8.80                             | 82.47                                | 562.81                          |
| GP181           | PI 283565                      | 0.45                     | 25.90                          | 7.83                                    | 13.31                                      | 91.14                                         | 8.80                             | 82.74                                | 564.37                          |
| GP182           | PI 283560                      | 0.43                     | 23.56                          | 8.27                                    | 14.94                                      | 90.74                                         | 7.74                             | 82.50                                | 494.81                          |
| GP184           | PI 283561                      | 0.46                     | 22.82                          | 8.68                                    | 16.71                                      | 90.41                                         | 7.07                             | 82.30                                | 450.60                          |
| GP196           | PI 337087                      | 0.34                     | 25.67                          | 7.86                                    | 12.87                                      | 91.20                                         | 8.85                             | 82.78                                | 567.95                          |
| GP197           | PI 317441                      | 0.41                     | 26.53                          | 8.40                                    | 13.74                                      | 89.95                                         | 7.70                             | 82.02                                | 490.08                          |
| GP198           | PI 317440                      | 0.38                     | 24.16                          | 8.62                                    | 12.99                                      | 90.00                                         | 8.38                             | 82.05                                | 532.85                          |
| GP199           | PI 317439                      | 0.37                     | 25.12                          | 8.36                                    | 12.85                                      | 90.74                                         | 8.53                             | 82.50                                | 545.48                          |
| GP206           | PI 283571                      | 0.45                     | 23.73                          | 8.00                                    | 12.49                                      | 91.21                                         | 9.18                             | 82.78                                | 589.25                          |
| GP207           | PI 283567                      | 0.46                     | 24.02                          | 8.38                                    | 14.81                                      | 90.87                                         | 8.63                             | 82.58                                | 552.23                          |
| GP209           | PI 422540                      | 0.30                     | 25.72                          | 8.10                                    | 11.94                                      | 90.97                                         | 9.55                             | 82.63                                | 611.91                          |
| GP213           | PI 577139                      | 0.25                     | 23.41                          | 7.95                                    | 14.55                                      | 91.32                                         | 8.35                             | 82.85                                | 536.20                          |
| GP214           | PI 577138                      | 0.31                     | 23.57                          | 8.46                                    | 11.99                                      | 90.63                                         | 9.96                             | 82.43                                | 636.44                          |
| GP215           | PI 442801                      | 0.39                     | 23.70                          | 7.77                                    | 14.29                                      | 91.49                                         | 7.88                             | 82.95                                | 506.87                          |
| GP222           | PI 283557                      | 0.44                     | 21.64                          | 8.36                                    | 13.73                                      | 89.98                                         | 8.45                             | 82.04                                | 537.59                          |
| GP224           | PI 283555                      | 0.36                     | 21.50                          | 8.32                                    | 13.89                                      | 90.36                                         | 8.34                             | 82.27                                | 532.62                          |
| GP225           | PI 283554                      | 0.42                     | 19.09                          | 8.82                                    | 17.54                                      | 89.90                                         | 6.80                             | 81.99                                | 432.03                          |
| GP227           | PI 283551                      | 0.33                     | 22.86                          | 8.49                                    | 13.80                                      | 90.15                                         | 8.70                             | 82.14                                | 553.93                          |
| GP228           | PI 283549                      | 0.49                     | 23.01                          | 8.92                                    | 15.12                                      | 89.93                                         | 8.02                             | 82.01                                | 509.72                          |
| GP229           | PI 283548                      | 0.31                     | 24.31                          | 8.11                                    | 13.97                                      | 90.10                                         | 8.31                             | 82.11                                | 529.00                          |
| GP230           | PI 268478                      | 0.36                     | 23.85                          | 8.05                                    | 15.34                                      | 90.99                                         | 7.67                             | 82.65                                | 491.37                          |
| GP232           | PI 251413                      | 0.36                     | 24.00                          | 8.36                                    | 13.02                                      | 90.13                                         | 8.23                             | 82.13                                | 524.39                          |
| GP233           | PI 244756                      | 0.41                     | 22.89                          | 8.79                                    | 12.65                                      | 89.76                                         | 9.39                             | 81.91                                | 596.07                          |
| GP234           | PI 239867                      | 0.33                     | 23.59                          | 8.96                                    | 15.86                                      | 90.31                                         | 8.46                             | 82.24                                | 539.91                          |

Table S7. continued

| Genotype       | USDA<br>GenBank<br>ID | Beta-<br>ODAP(%) | Raw<br>protein (%) | Acid<br>detergent<br>fiber (%) | Neutral<br>detergent<br>fiber (%) | Total<br>digestible<br>nutrients (%) | Dry matter<br>intake (%) | Digestible dry<br>matter (%) | Relative feed<br>values |
|----------------|-----------------------|------------------|--------------------|--------------------------------|-----------------------------------|--------------------------------------|--------------------------|------------------------------|-------------------------|
| GP235          | PI 239866             | 0.39             | 23.31              | 8.41                           | 15.35                             | 90.68                                | 7.85                     | 82.46                        | 501.95                  |
| GP237          | PI 231456             | 0.42             | 22.94              | 8.70                           | 14.94                             | 89.90                                | 8.16                     | 81.99                        | 518.25                  |
| GP242          | PI 222203             | 0.40             | 24.12              | 8.18                           | 12.19                             | 90.70                                | 9.95                     | 82.47                        | 635.90                  |
| GP243          | PI 221466             | 0.40             | 21.42              | 9.50                           | 14.76                             | 89.64                                | 8.37                     | 81.83                        | 530.80                  |
| GP244          | PI 221465             | 0.37             | 23.88              | 8.44                           | 13.24                             | 90.46                                | 8.99                     | 82.33                        | 573.42                  |
| GP246          | PI 220176             | 0.48             | 23.57              | 8.27                           | 13.63                             | 90.57                                | 8.85                     | 82.39                        | 565.03                  |
| GP247          | PI 219923             | 0.35             | 21.99              | 8.97                           | 14.23                             | 89.24                                | 7.63                     | 81.59                        | 482.79                  |
| GP248          | PI 210342             | 0.49             | 23.78              | 9.16                           | 14.20                             | 89.06                                | 7.69                     | 81.48                        | 485.87                  |
| GP249          | PI 206375             | 0.38             | 22.96              | 8.15                           | 11.76                             | 90.87                                | 9.83                     | 82.58                        | 629.96                  |
| GP251          | PI 196863             | 0.43             | 21.73              | 9.74                           | 15.51                             | 89.16                                | 7.81                     | 81.55                        | 493.48                  |
| GP256          | PI 195997             | 0.39             | 25.09              | 8.43                           | 13.29                             | 90.53                                | 8.26                     | 82.37                        | 527.57                  |
| GP262          | PI 195605             | 0.35             | 24.83              | 8.55                           | 14.28                             | 90.06                                | 8.22                     | 82.09                        | 523.53                  |
| GP270          | PI 193815             | 0.36             | 26.55              | 6.87                           | 13.94                             | 92.23                                | 8.38                     | 83.40                        | 542.50                  |
| Gürbüz         | Control               | 0.38             | 25.12              | 7.39                           | 14.42                             | 91.74                                | 7.95                     | 83.10                        | 511.70                  |
| Karadağ        | Control               | 0.39             | 22.18              | 8.82                           | 17.25                             | 89.87                                | 7.17                     | 81.97                        | 455.51                  |
| İptaş          | Control               | 0.42             | 23.45              | 8.67                           | 15.21                             | 90.24                                | 8.11                     | 82.20                        | 517.11                  |
| Corea          | Control               | 0.44             | 20.52              | 8.71                           | 14.31                             | 90.53                                | 8.84                     | 82.37                        | 564.83                  |
| Means $\pm$ SD |                       | 0.38 $\pm$ 0.1   | 24.00 $\pm$ 2.46   | 8.20 $\pm$ 0.73                | 13.98 $\pm$ 2.52                  | 90.66 $\pm$ 0.96                     | 8.45 $\pm$ 1.41          | 82.45 $\pm$ 0.57             | 539.95 $\pm$ 91.8       |
| LSD            |                       | 0.01**           | 0.58**             | 0.29**                         | 0.96**                            | 0.92**                               | 1.63*                    | 0.55**                       | 106.09*                 |

\*, \*\*: Statistically significant at  $p = 0.05$  and  $p = 0.001$  significance level, respectively.

LSD is least significant differences
