# Supplementary material
Source: MDPI journal article supplement (https://www.mdpi.com/2073-4395/12/10/2426)
Supplement: s1 [file s1 › Table S8.pdf]

**Table S8.** Analysis of variance of augmented block design for forage and quality traits in grass pea collection produced 2021 growing season in Isparta (highland), Turkey

| Source   | df | Beta-ODAP (%) | Raw protein (%) | Acid detergent fiber (%) | Neutral detergent fiber (%) | Total digestible nutrients (%) | Dry matter intake (%) | Digestible dry matter (%) | Relative feed values |
|----------|----|---------------|-----------------|--------------------------|-----------------------------|--------------------------------|-----------------------|---------------------------|----------------------|
| Genotype | 93 | 0.01 **       | 3.27 **         | 0.63 **                  | 6.89 **                     | 1.06 **                        | 1.47 **               | 0.39 **                   | 6139.04 **           |
| Controls | 3  | 0.01 **       | 6.17 **         | 2.45 **                  | 8.6 **                      | 4.09 **                        | 3.05 **               | 1.49 **                   | 11870.22 **          |
| Blocks   | 2  | 2.4e-32 ns    | 9.1e-30 ns      | 2.7e-31 ns               | 4.6e-30 ns                  | 1.2e-31 ns                     | 1.7e-30 ns            | 1.2e-31 ns                | 7.7e-27 ns           |
| Error    | 6  | 3.3e-33       | 5.4e-30         | 1.7e-30                  | 4.7e-29                     | 1.9e-30                        | 1.1e-29               | 9.4e-31                   | 4.8e-26              |

\*\*: Statistically significant at and  $p = 0.001$  significance level, respectively. ns is non-significant

df is degree of freedom
