# Supplementary material
Source: MDPI journal article supplement (https://www.mdpi.com/2073-4395/12/10/2426)
Supplement: s1 [file s1 › Table S9.pdf]

**Table S9.** Means of eight quality and forage traits for grass pea collection produced in the 2021 growing season, Isparta (lowland), Turkey

| Genotype | USDA<br>GenBank<br>ID | Beta-<br>ODAP(%) | Raw<br>protein<br>(%) | Acid<br>detergent<br>fiber (%) | Neutral<br>detergent<br>fiber (%) | Total<br>digestible<br>nutrients (%) | Dry matter<br>intake (%) | Digestible dry<br>matter (%) | Relative feed<br>values |
|----------|-----------------------|------------------|-----------------------|--------------------------------|-----------------------------------|--------------------------------------|--------------------------|------------------------------|-------------------------|
| GP2      | PI 117250             | 0.29             | 20.79                 | 7.99                           | 15.22                             | 91.04                                | 7.89                     | 82.68                        | 505.65                  |
| GP6      | PI 117243             | 0.43             | 21.79                 | 8.04                           | 14.17                             | 90.97                                | 8.47                     | 82.64                        | 542.52                  |
| GP7      | PI 117283             | 0.35             | 21.19                 | 8.17                           | 14.64                             | 90.80                                | 8.20                     | 82.54                        | 524.60                  |
| GP10     | PI 117209             | 0.47             | 21.76                 | 7.71                           | 14.53                             | 91.39                                | 8.26                     | 82.89                        | 530.72                  |
| GP11     | PI 117424             | 0.48             | 21.87                 | 7.78                           | 14.35                             | 91.31                                | 8.37                     | 82.84                        | 537.10                  |
| GP17     | PI 117454             | 0.19             | 20.09                 | 9.58                           | 14.33                             | 88.98                                | 8.38                     | 81.44                        | 528.98                  |
| GP18     | PI 117594             | 0.21             | 23.53                 | 7.50                           | 12.97                             | 91.66                                | 9.25                     | 83.06                        | 595.69                  |
| GP19     | PI 117229             | 0.35             | 19.34                 | 9.87                           | 14.79                             | 88.60                                | 8.12                     | 81.21                        | 511.11                  |
| GP23     | PI 117401             | 0.23             | 19.96                 | 8.81                           | 15.23                             | 89.98                                | 7.88                     | 82.04                        | 500.97                  |
| GP34     | PI 667278             | 0.39             | 21.69                 | 7.95                           | 14.36                             | 91.08                                | 8.36                     | 82.70                        | 536.06                  |
| GP40     | PI 422539             | 0.26             | 22.37                 | 8.06                           | 13.57                             | 90.95                                | 8.85                     | 82.62                        | 566.56                  |
| GP41     | PI 358891             | 0.30             | 22.52                 | 8.14                           | 13.34                             | 90.84                                | 9.00                     | 82.56                        | 575.72                  |
| GP42     | PI 283599             | 0.33             | 20.25                 | 8.58                           | 15.14                             | 90.27                                | 7.93                     | 82.21                        | 505.02                  |
| GP43     | PI 283589             | 0.43             | 23.29                 | 8.45                           | 12.26                             | 90.44                                | 9.80                     | 82.31                        | 625.30                  |
| GP44     | PI 283580             | 0.32             | 21.82                 | 8.06                           | 17.12                             | 90.94                                | 7.02                     | 82.62                        | 449.39                  |
| GP45     | PI 283569             | 0.42             | 20.93                 | 9.45                           | 17.62                             | 89.15                                | 6.81                     | 81.54                        | 430.35                  |
| GP47     | PI 221467             | 0.40             | 20.44                 | 8.60                           | 14.96                             | 90.24                                | 8.03                     | 82.20                        | 511.37                  |
| GP49     | PI 667277             | 0.22             | 18.94                 | 8.39                           | 16.67                             | 90.52                                | 7.20                     | 82.36                        | 459.76                  |
| GP53     | PI 667271             | 0.29             | 22.51                 | 7.70                           | 15.12                             | 91.40                                | 7.94                     | 82.90                        | 510.12                  |
| GP58     | PI 667276             | 0.26             | 20.73                 | 7.52                           | 15.75                             | 91.64                                | 7.62                     | 83.04                        | 490.37                  |
| GP59     | PI 667275             | 0.26             | 21.24                 | 7.79                           | 14.97                             | 91.29                                | 8.02                     | 82.83                        | 514.95                  |
| GP60     | PI 667265             | 0.23             | 20.29                 | 8.59                           | 15.13                             | 90.26                                | 7.93                     | 82.21                        | 505.46                  |
| GP61     | PI 667264             | 0.25             | 20.74                 | 8.66                           | 15.26                             | 90.17                                | 7.86                     | 82.16                        | 500.57                  |
| GP74     | PI 513243             | 0.26             | 19.19                 | 8.43                           | 18.39                             | 90.47                                | 6.53                     | 82.34                        | 416.55                  |
| GP103    | PI 667251             | 0.29             | 23.25                 | 8.25                           | 12.50                             | 90.70                                | 9.61                     | 82.47                        | 614.05                  |
| GP104    | PI 667250             | 0.26             | 18.69                 | 9.15                           | 19.49                             | 89.53                                | 6.16                     | 81.77                        | 390.31                  |
| GP105    | PI 667248             | 0.29             | 22.33                 | 8.36                           | 13.31                             | 90.56                                | 9.02                     | 82.39                        | 576.14                  |

**Table S9.** continued

| <b>Genotype</b> | <b>USDA<br/>GenBank<br/>ID</b> | <b>Beta-<br/>ODAP(%)</b> | <b>Raw<br/>protein<br/>(%)</b> | <b>Acid<br/>detergent<br/>fiber (%)</b> | <b>Neutral<br/>detergent<br/>fiber (%)</b> | <b>Total<br/>digestible<br/>nutrients (%)</b> | <b>Dry matter<br/>intake (%)</b> | <b>Digestible dry<br/>matter (%)</b> | <b>Relative feed<br/>values</b> |
|-----------------|--------------------------------|--------------------------|--------------------------------|-----------------------------------------|--------------------------------------------|-----------------------------------------------|----------------------------------|--------------------------------------|---------------------------------|
| GP107           | PI 511770                      | 0.36                     | 22.25                          | 7.79                                    | 13.96                                      | 91.30                                         | 8.60                             | 82.83                                | 551.97                          |
| GP108           | PI 507931                      | 0.26                     | 21.35                          | 7.83                                    | 14.82                                      | 91.24                                         | 8.11                             | 82.80                                | 520.29                          |
| GP110           | PI 422538                      | 0.29                     | 21.43                          | 7.47                                    | 15.11                                      | 91.71                                         | 7.95                             | 83.08                                | 511.92                          |
| GP114           | PI 422529                      | 0.31                     | 19.31                          | 7.60                                    | 17.09                                      | 91.54                                         | 7.02                             | 82.98                                | 451.64                          |
| GP116           | PI 422521                      | 0.33                     | 20.05                          | 7.98                                    | 15.97                                      | 91.05                                         | 7.52                             | 82.68                                | 482.11                          |
| GP117           | PI 337007                      | 0.32                     | 22.11                          | 7.63                                    | 14.25                                      | 91.49                                         | 8.43                             | 82.95                                | 541.98                          |
| GP119           | PI 283592                      | 0.50                     | 23.26                          | 7.66                                    | 13.08                                      | 91.46                                         | 9.19                             | 82.93                                | 590.37                          |
| GP120           | PI 283587                      | 0.29                     | 20.19                          | 8.48                                    | 19.66                                      | 90.41                                         | 6.10                             | 82.30                                | 389.26                          |
| GP124           | PI 283579                      | 0.33                     | 23.26                          | 7.58                                    | 13.17                                      | 91.56                                         | 9.11                             | 82.99                                | 586.17                          |
| GP133           | PI 232923                      | 0.49                     | 21.69                          | 8.36                                    | 13.95                                      | 90.55                                         | 8.61                             | 82.39                                | 549.73                          |
| GP135           | PI 195995                      | 0.49                     | 23.88                          | 7.39                                    | 12.54                                      | 91.81                                         | 9.58                             | 83.15                                | 617.03                          |
| GP145           | PI 283562                      | 0.27                     | 19.10                          | 9.36                                    | 16.87                                      | 89.26                                         | 7.11                             | 81.61                                | 449.95                          |
| GP147           | PI 283576                      | 0.25                     | 22.54                          | 8.30                                    | 13.15                                      | 90.64                                         | 9.13                             | 82.44                                | 583.19                          |
| GP149           | PI 283595                      | 0.29                     | 20.41                          | 7.86                                    | 13.75                                      | 91.20                                         | 8.73                             | 82.78                                | 559.88                          |
| GP150           | PI 283594                      | 0.33                     | 16.65                          | 8.39                                    | 18.98                                      | 90.52                                         | 6.33                             | 82.37                                | 403.76                          |
| GP152           | PI 283588                      | 0.40                     | 21.63                          | 8.48                                    | 18.55                                      | 90.40                                         | 6.47                             | 82.29                                | 412.70                          |
| GP156           | PI 283559                      | 0.33                     | 18.45                          | 9.88                                    | 20.33                                      | 88.59                                         | 5.90                             | 81.20                                | 371.41                          |
| GP157           | PI 193544                      | 0.32                     | 21.44                          | 9.61                                    | 19.62                                      | 88.95                                         | 6.12                             | 81.42                                | 385.99                          |
| GP161           | PI 429368                      | 0.32                     | 21.64                          | 9.87                                    | 18.82                                      | 88.61                                         | 6.38                             | 81.21                                | 401.44                          |
| GP163           | PI 422541                      | 0.38                     | 20.07                          | 9.59                                    | 20.35                                      | 88.97                                         | 5.90                             | 81.43                                | 372.21                          |
| GP164           | PI 422531                      | 0.39                     | 20.16                          | 8.02                                    | 21.84                                      | 91.00                                         | 5.49                             | 82.66                                | 351.99                          |
| GP165           | PI 422527                      | 0.35                     | 22.29                          | 8.96                                    | 12.75                                      | 89.79                                         | 9.42                             | 81.92                                | 597.89                          |
| GP166           | PI 422526                      | 0.45                     | 22.67                          | 9.27                                    | 15.82                                      | 89.38                                         | 7.59                             | 81.68                                | 480.42                          |
| GP177           | PI 283584                      | 0.50                     | 19.78                          | 7.58                                    | 16.65                                      | 91.57                                         | 7.21                             | 83.00                                | 463.84                          |
| GP178           | PI 283577                      | 0.36                     | 22.25                          | 7.79                                    | 13.96                                      | 91.30                                         | 8.60                             | 82.83                                | 551.97                          |

Table S9. continued

| Genotype | USDA<br>GenBank<br>ID | Beta-<br>ODAP(%) | Raw<br>protein<br>(%) | Acid<br>detergent<br>fiber (%) | Neutral<br>detergent<br>fiber (%) | Total<br>digestible<br>nutrients (%) | Dry matter<br>intake (%) | Digestible dry<br>matter (%) | Relative feed<br>values |
|----------|-----------------------|------------------|-----------------------|--------------------------------|-----------------------------------|--------------------------------------|--------------------------|------------------------------|-------------------------|
| GP179    | PI 283573             | 0.36             | 21.71                 | 8.54                           | 16.09                             | 90.33                                | 7.46                     | 82.25                        | 475.56                  |
| GP180    | PI 283572             | 0.37             | 18.39                 | 8.29                           | 18.33                             | 90.65                                | 6.55                     | 82.44                        | 418.22                  |
| GP181    | PI 283565             | 0.38             | 22.56                 | 7.70                           | 13.75                             | 91.41                                | 8.73                     | 82.90                        | 560.98                  |
| GP182    | PI 283560             | 0.39             | 20.28                 | 7.89                           | 15.83                             | 91.17                                | 7.58                     | 82.76                        | 486.32                  |
| GP184    | PI 283561             | 0.38             | 19.13                 | 7.70                           | 17.16                             | 91.41                                | 7.00                     | 82.90                        | 449.42                  |
| GP196    | PI 337087             | 0.37             | 21.09                 | 7.70                           | 15.22                             | 91.41                                | 7.89                     | 82.90                        | 506.92                  |
| GP197    | PI 317441             | 0.39             | 20.83                 | 9.25                           | 21.59                             | 89.41                                | 5.56                     | 81.70                        | 351.91                  |
| GP198    | PI 317440             | 0.37             | 19.66                 | 8.61                           | 18.41                             | 90.24                                | 6.52                     | 82.20                        | 415.49                  |
| GP199    | PI 317439             | 0.41             | 19.24                 | 8.21                           | 24.23                             | 90.75                                | 4.95                     | 82.50                        | 316.72                  |
| GP206    | PI 283571             | 0.42             | 21.36                 | 7.59                           | 15.05                             | 91.54                                | 7.98                     | 82.98                        | 513.45                  |
| GP207    | PI 283567             | 0.36             | 23.98                 | 7.76                           | 12.26                             | 91.33                                | 9.79                     | 82.85                        | 628.88                  |
| GP209    | PI 422540             | 0.37             | 22.76                 | 7.34                           | 13.89                             | 91.87                                | 8.64                     | 83.18                        | 557.21                  |
| GP213    | PI 577139             | 0.25             | 22.39                 | 7.19                           | 14.40                             | 92.07                                | 8.34                     | 83.30                        | 538.19                  |
| GP214    | PI 577138             | 0.29             | 22.69                 | 7.75                           | 13.55                             | 91.34                                | 8.86                     | 82.86                        | 568.97                  |
| GP215    | PI 442801             | 0.51             | 19.65                 | 7.88                           | 19.14                             | 91.18                                | 6.27                     | 82.77                        | 402.28                  |
| GP222    | PI 283557             | 0.27             | 18.74                 | 10.22                          | 16.35                             | 88.15                                | 7.34                     | 80.94                        | 460.46                  |
| GP224    | PI 283555             | 0.33             | 17.17                 | 9.68                           | 18.15                             | 88.85                                | 6.61                     | 81.36                        | 416.81                  |
| GP225    | PI 283554             | 0.39             | 13.52                 | 8.98                           | 21.49                             | 89.75                                | 5.58                     | 81.90                        | 354.48                  |
| GP227    | PI 283551             | 0.32             | 21.94                 | 8.62                           | 13.42                             | 90.22                                | 8.95                     | 82.18                        | 570.26                  |
| GP228    | PI 283549             | 0.37             | 21.35                 | 8.74                           | 13.93                             | 90.07                                | 8.62                     | 82.09                        | 548.52                  |
| GP229    | PI 283548             | 0.33             | 19.92                 | 9.77                           | 15.32                             | 88.74                                | 7.84                     | 81.29                        | 493.93                  |
| GP230    | PI 268478             | 0.36             | 19.70                 | 7.91                           | 16.36                             | 91.13                                | 7.35                     | 82.74                        | 471.51                  |
| GP232    | PI 251413             | 0.33             | 20.27                 | 9.28                           | 20.79                             | 89.37                                | 5.77                     | 81.67                        | 365.36                  |
| GP233    | PI 244756             | 0.37             | 22.19                 | 8.69                           | 13.13                             | 90.13                                | 9.15                     | 82.13                        | 582.62                  |
| GP234    | PI 239867             | 0.33             | 23.55                 | 8.02                           | 12.43                             | 91.00                                | 9.66                     | 82.65                        | 618.60                  |

Table S9. continued

| Genotype       | USDA<br>GenBank<br>ID | Beta-<br>ODAP(%) | Raw<br>protein (%) | Acid<br>detergent<br>fiber (%) | Neutral<br>detergent<br>fiber (%) | Total<br>digestible<br>nutrients (%) | Dry matter<br>intake (%) | Digestible dry<br>matter (%) | Relative feed<br>values |
|----------------|-----------------------|------------------|--------------------|--------------------------------|-----------------------------------|--------------------------------------|--------------------------|------------------------------|-------------------------|
| GP235          | PI 239866             | 0.40             | 21.77              | 7.76                           | 14.46                             | 91.33                                | 8.31                     | 82.85                        | 533.58                  |
| GP237          | PI 231456             | 0.32             | 20.30              | 8.99                           | 14.70                             | 89.75                                | 8.17                     | 81.90                        | 518.53                  |
| GP242          | PI 222203             | 0.32             | 24.64              | 7.85                           | 11.52                             | 91.21                                | 10.42                    | 82.78                        | 668.63                  |
| GP243          | PI 221466             | 0.40             | 19.74              | 8.43                           | 15.84                             | 90.47                                | 7.58                     | 82.33                        | 483.84                  |
| GP244          | PI 221465             | 0.38             | 22.43              | 8.39                           | 13.17                             | 90.52                                | 9.12                     | 82.37                        | 581.84                  |
| GP246          | PI 220176             | 0.39             | 23.04              | 8.27                           | 12.66                             | 90.67                                | 9.48                     | 82.45                        | 605.96                  |
| GP247          | PI 219923             | 0.38             | 23.53              | 9.97                           | 20.49                             | 88.47                                | 5.86                     | 81.13                        | 368.35                  |
| GP248          | PI 210342             | 0.45             | 24.08              | 10.15                          | 19.78                             | 88.25                                | 6.07                     | 81.00                        | 380.89                  |
| GP249          | PI 206375             | 0.39             | 18.47              | 8.65                           | 16.87                             | 90.18                                | 7.11                     | 82.16                        | 453.00                  |
| GP251          | PI 196863             | 0.41             | 21.26              | 8.98                           | 13.76                             | 89.76                                | 8.73                     | 81.91                        | 554.07                  |
| GP256          | PI 195997             | 0.46             | 21.74              | 8.55                           | 17.07                             | 90.31                                | 7.03                     | 82.24                        | 448.32                  |
| GP262          | PI 195605             | 0.48             | 20.53              | 9.06                           | 14.38                             | 89.65                                | 8.35                     | 81.84                        | 529.37                  |
| GP270          | PI 193815             | 0.40             | 21.14              | 7.35                           | 15.53                             | 91.86                                | 7.73                     | 83.17                        | 498.14                  |
| Gürbüz         | Control               | 0.36             | 22.32              | 8.38                           | 13.30                             | 90.53                                | 9.03                     | 82.37                        | 576.75                  |
| Karadağ        | Control               | 0.44             | 21.07              | 7.81                           | 16.47                             | 91.27                                | 7.29                     | 82.81                        | 467.81                  |
| İptaş          | Control               | 0.41             | 19.49              | 9.98                           | 14.56                             | 88.47                                | 8.24                     | 81.13                        | 518.39                  |
| Corea          | Control               | 0.45             | 22.84              | 8.83                           | 12.33                             | 89.96                                | 9.73                     | 82.02                        | 618.74                  |
| Means $\pm$ SD |                       | 0.35 $\pm$ 0.07  | 21.06 $\pm$ 1.77   | 8.43 $\pm$ 0.75                | 15.72 $\pm$ 2.63                  | 90.47 $\pm$ 0.97                     | 7.83 $\pm$ 1.19          | 82.33 $\pm$ 0.59             | 499.86 $\pm$ 77.55      |
| LSD            |                       | **               | **                 | **                             | **                                | **                                   | **                       | **                           | **                      |

\*\*: Statistically significant at  $p = 0.001$  significance level.

LSD is least significant differences
